# Supplementary material for: Beta oscillations and waves in motor cortex can be accounted for by the interplay of spatially structured connectivity and fluctuating inputs
Source: eLife journal article supplement (doi:10.7554/elife.81446), 2023-03-14

**a** Electrode position of monkey L

|    |    |    |    |    |    |    |    |    |    |
|----|----|----|----|----|----|----|----|----|----|
| 1  | 2  | 98 | 3  | 97 | 6  | 8  | 10 | 14 | 18 |
| 65 | 66 | 33 | 34 | 7  | 9  | 11 | 12 | 16 | 99 |
| 67 | 68 | 35 | 36 | 5  | 17 | 13 | 23 | 20 | 0  |
| 69 | 70 | 37 | 38 | 48 | 15 | 19 | 25 | 27 | 24 |
| 71 | 72 | 39 | 40 | 42 | 50 | 54 | 21 | 29 | 26 |
| 73 | 74 | 41 | 43 | 44 | 46 | 52 | 62 | 31 | 28 |
| 75 | 76 | 45 | 47 | 51 | 56 | 58 | 60 | 64 | 30 |
| 77 | 78 | 82 | 49 | 53 | 55 | 57 | 59 | 61 | 32 |
| 79 | 80 | 84 | 86 | 87 | 89 | 91 | 94 | 63 | 95 |
| 4  | 81 | 83 | 85 | 88 | 90 | 92 | 93 | 96 | 22 |

**b** Electrode position of monkey N

|    |    |    |    |    |    |    |    |    |    |
|----|----|----|----|----|----|----|----|----|----|
| 98 | 2  | 1  | 3  | 4  | 6  | 8  | 10 | 14 | 97 |
| 65 | 66 | 33 | 34 | 7  | 9  | 11 | 12 | 16 | 18 |
| 67 | 68 | 35 | 36 | 5  | 17 | 13 | 23 | 20 | 22 |
| 69 | 70 | 37 | 38 | 48 | 15 | 19 | 25 | 27 | 24 |
| 71 | 72 | 39 | 40 | 42 | 50 | 54 | 21 | 29 | 26 |
| 73 | 74 | 41 | 43 | 44 | 46 | 52 | 62 | 31 | 28 |
| 75 | 76 | 45 | 47 | 51 | 56 | 58 | 60 | 64 | 30 |
| 77 | 78 | 82 | 49 | 53 | 55 | 57 | 59 | 61 | 32 |
| 79 | 80 | 84 | 86 | 87 | 89 | 91 | 94 | 63 | 95 |
| 0  | 81 | 83 | 85 | 88 | 90 | 92 | 93 | 96 | 99 |

**c** Raw signal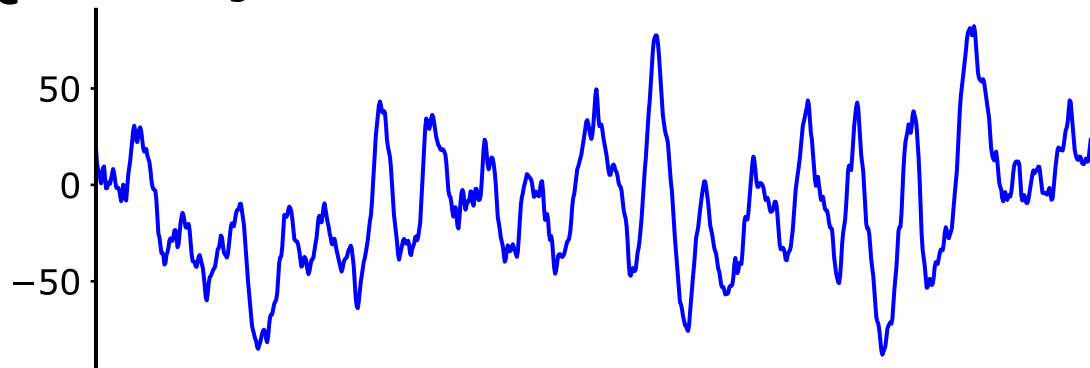**d** Hilbert transform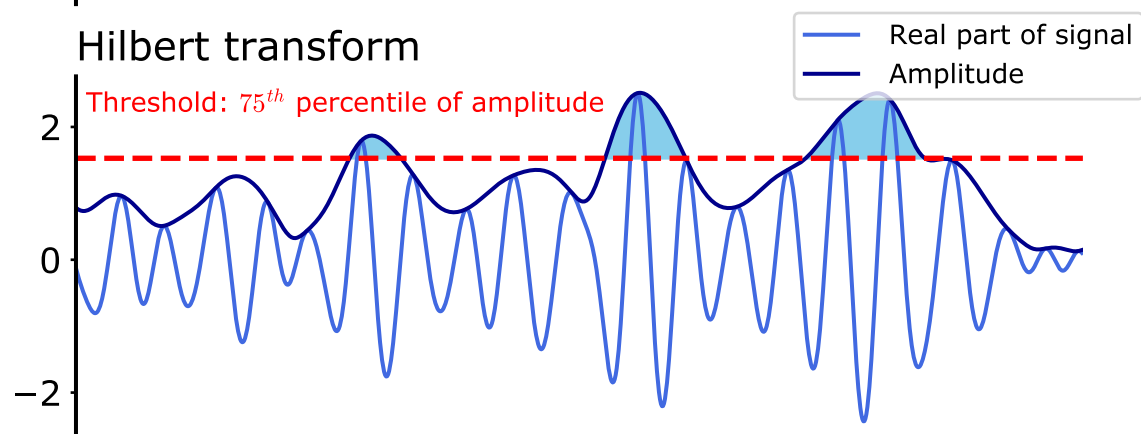**e** Spectrogram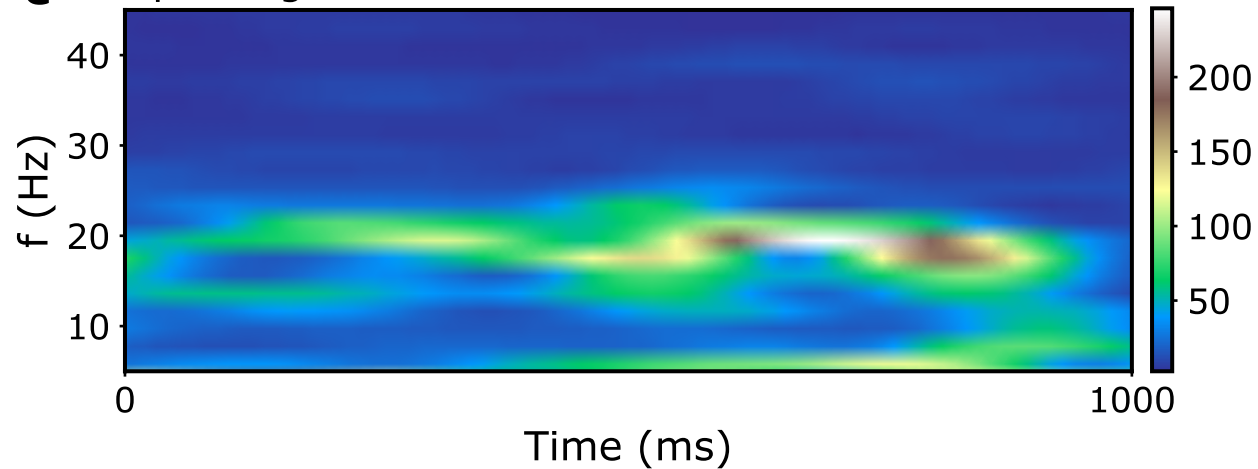

Supplement: supp [file elife_poa_e81446_Figure_2_figure_supplement_2.pdf › elife_poa_e81446_Figure_2_figure_supplement_2.pdf]
