# Supplementary figures and images for: Beta oscillations and waves in motor cortex can be accounted for by the interplay of spatially structured connectivity and fluctuating inputs
Source: eLife journal article supplement (doi:10.7554/elife.81446), 2023-03-14

# Monkey L

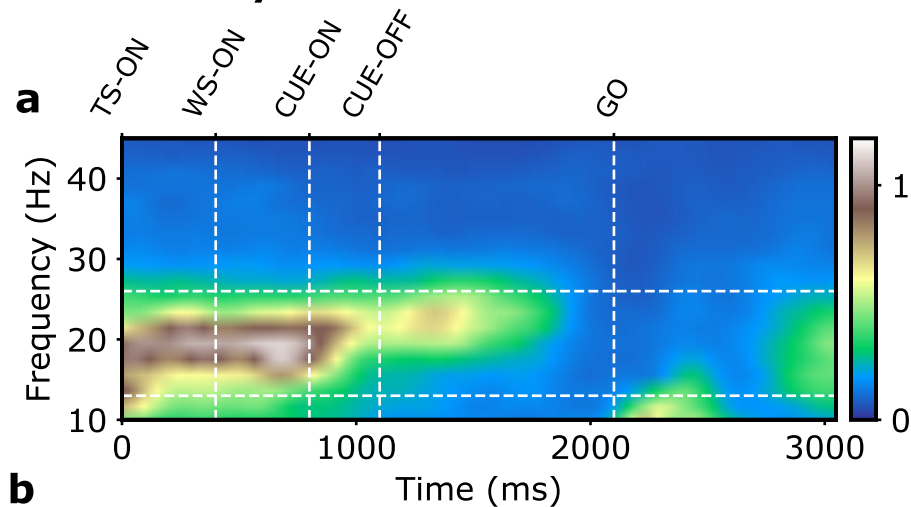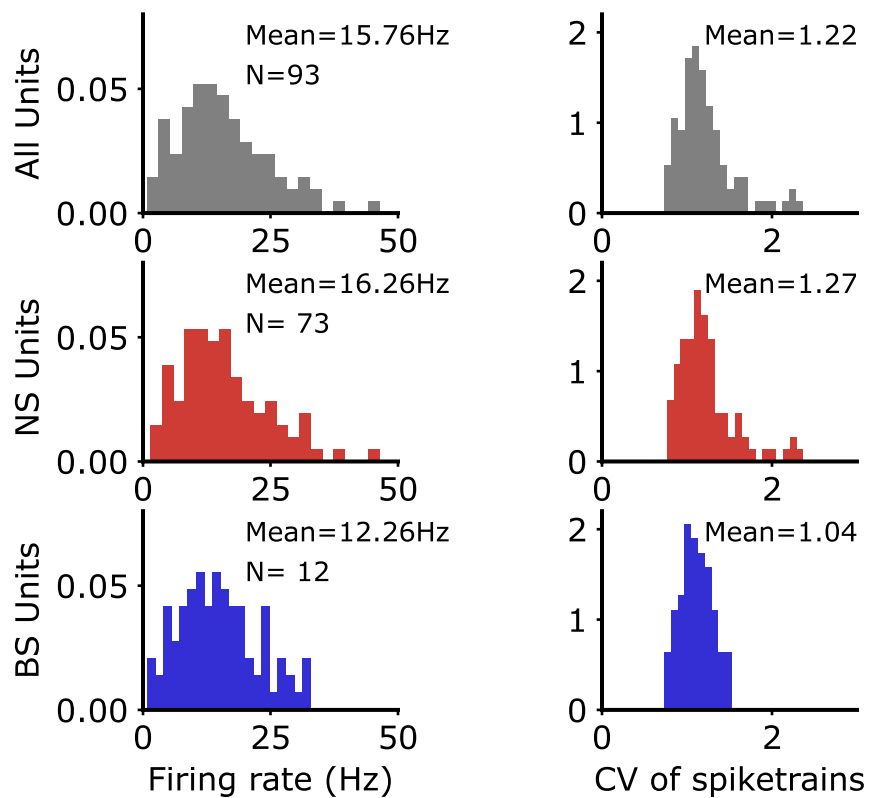

# Monkey N

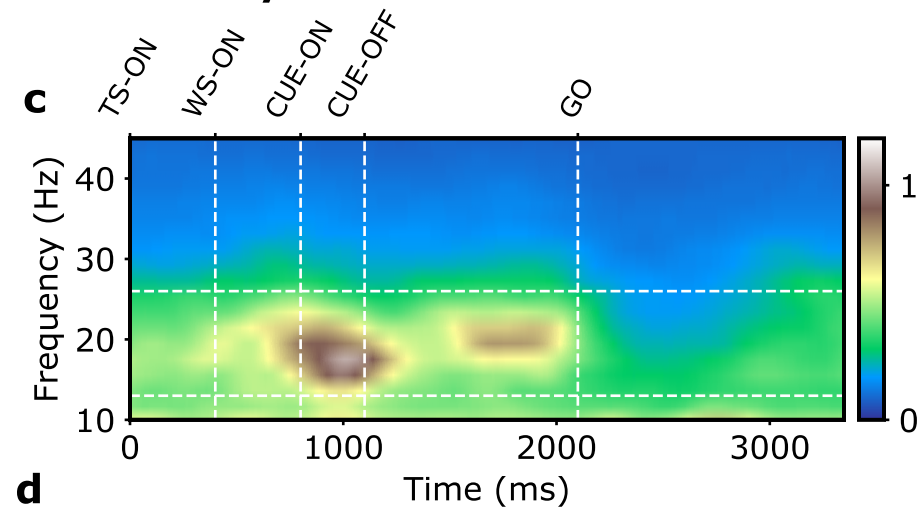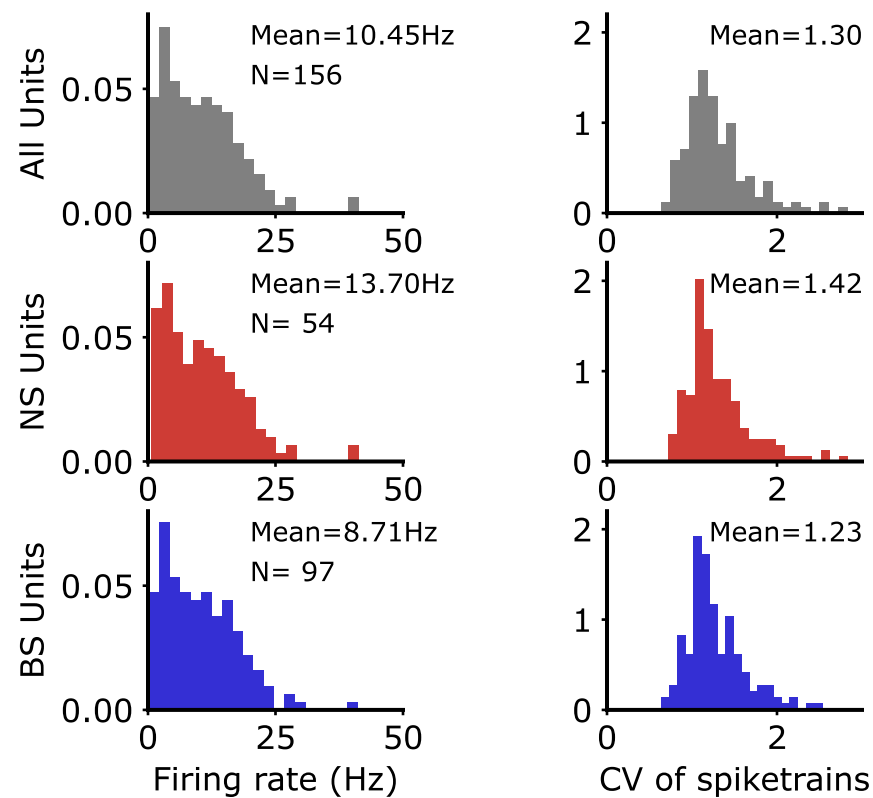

Supplement: supp [file elife_poa_e81446_Figure_1_figure_supplement_1.pdf › elife_poa_e81446_Figure_1_figure_supplement_1.pdf]

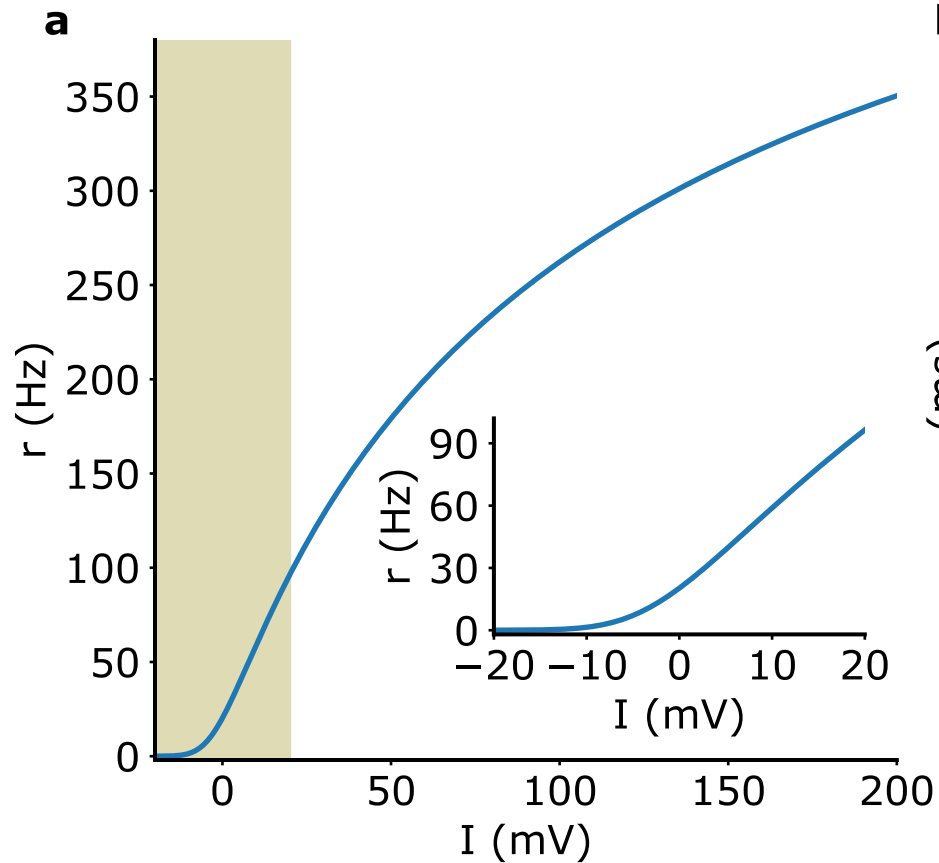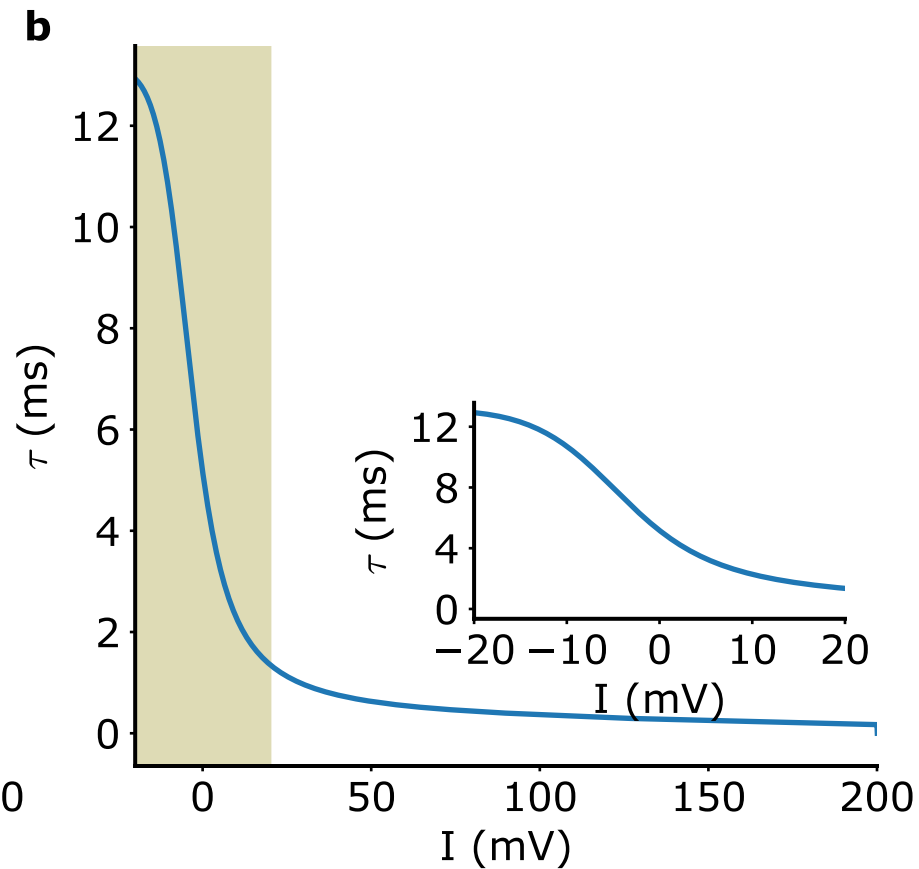

Supplement: supp [file elife_poa_e81446_Figure_1_figure_supplement_3.pdf › elife_poa_e81446_Figure_1_figure_supplement_3.pdf]

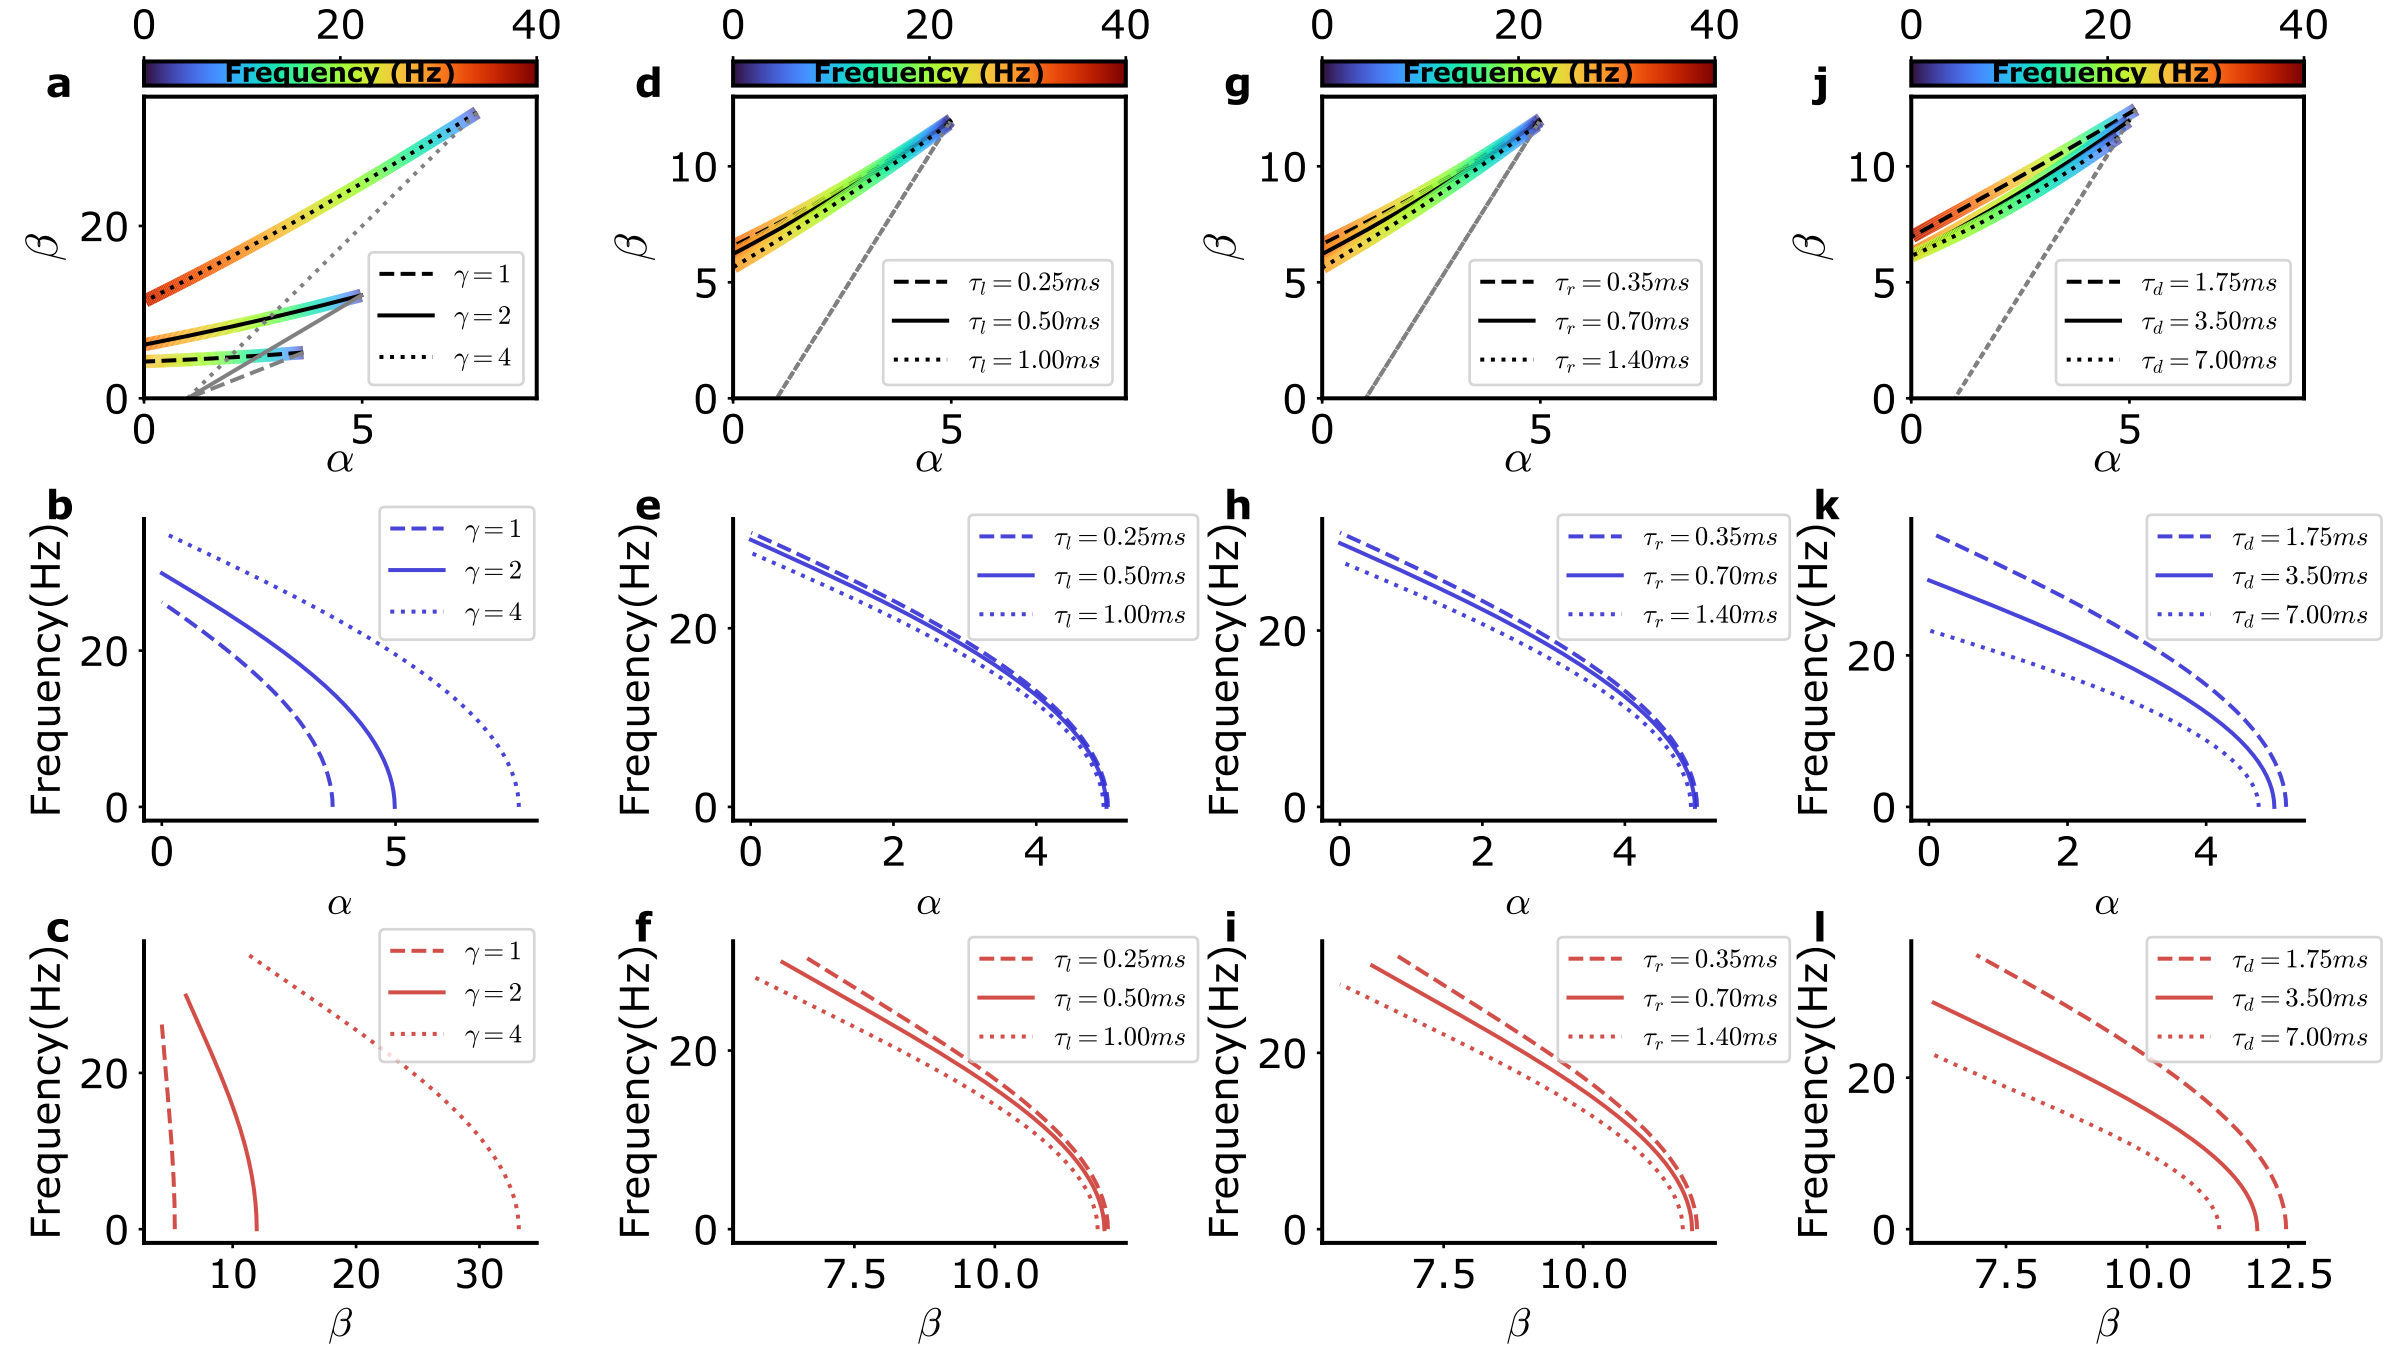

Supplement: supp [file elife_poa_e81446_Figure_1_figure_supplement_4.pdf › elife_poa_e81446_Figure_1_figure_supplement_4.pdf]

**Monkey N**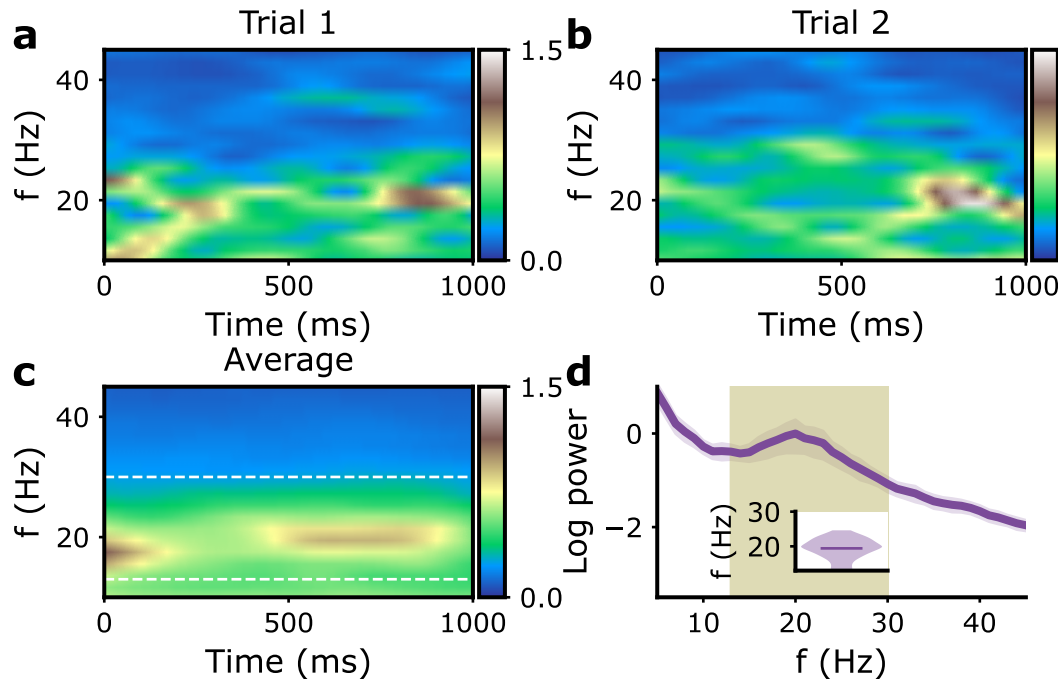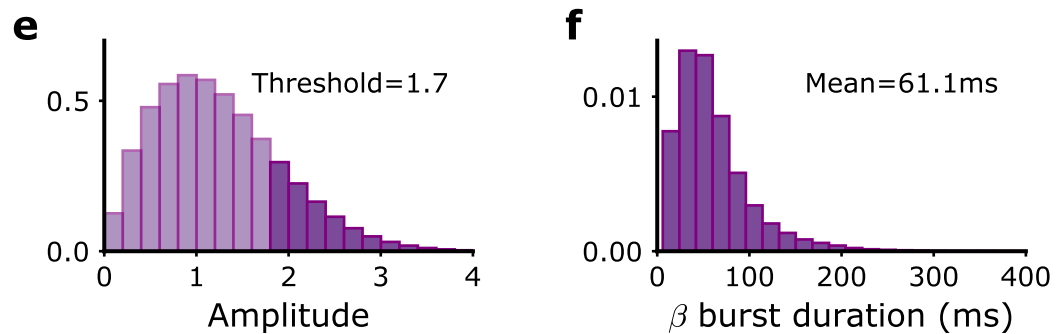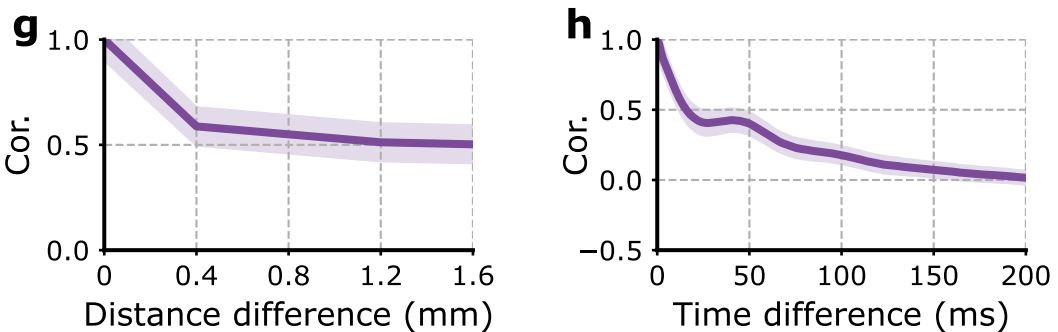**SN'**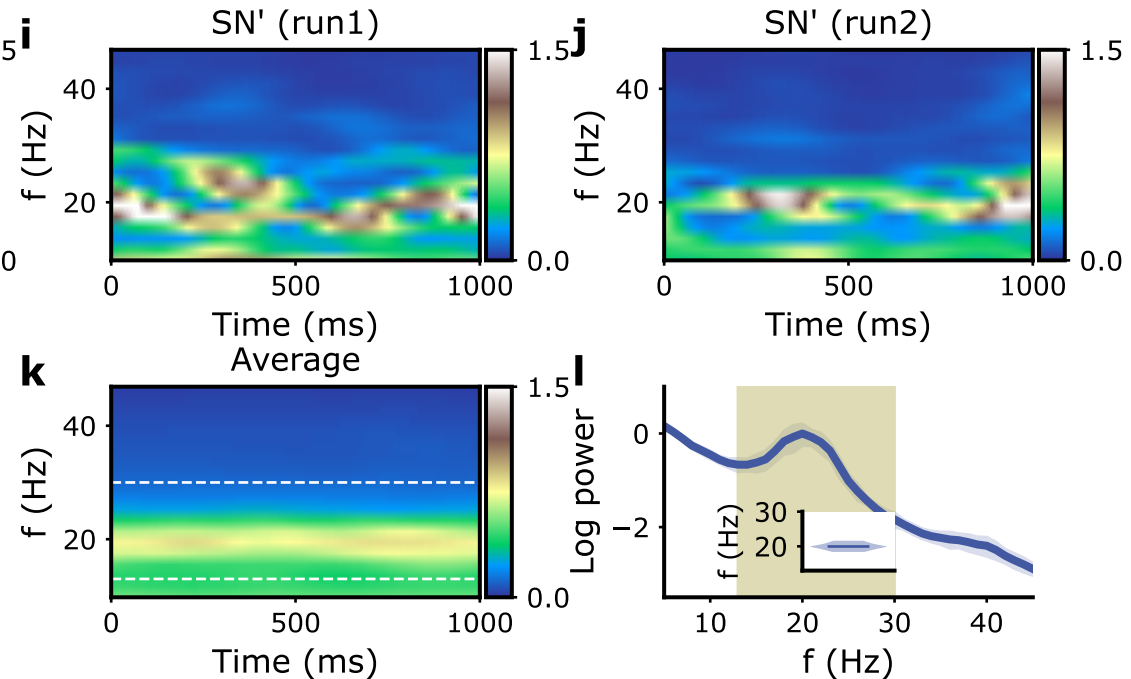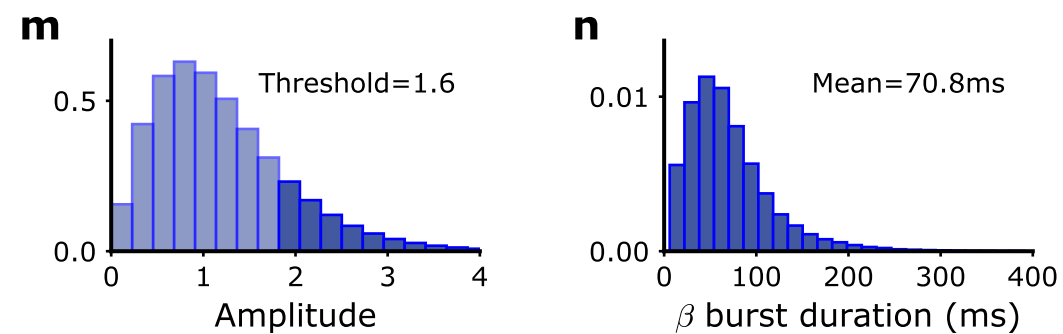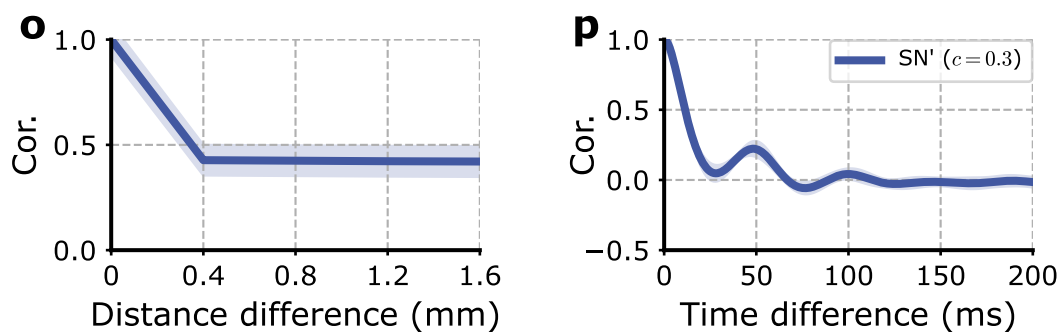

Supplement: supp [file elife_poa_e81446_Figure_2_figure_supplement_1.pdf › elife_poa_e81446_Figure_2_figure_supplement_1.pdf]

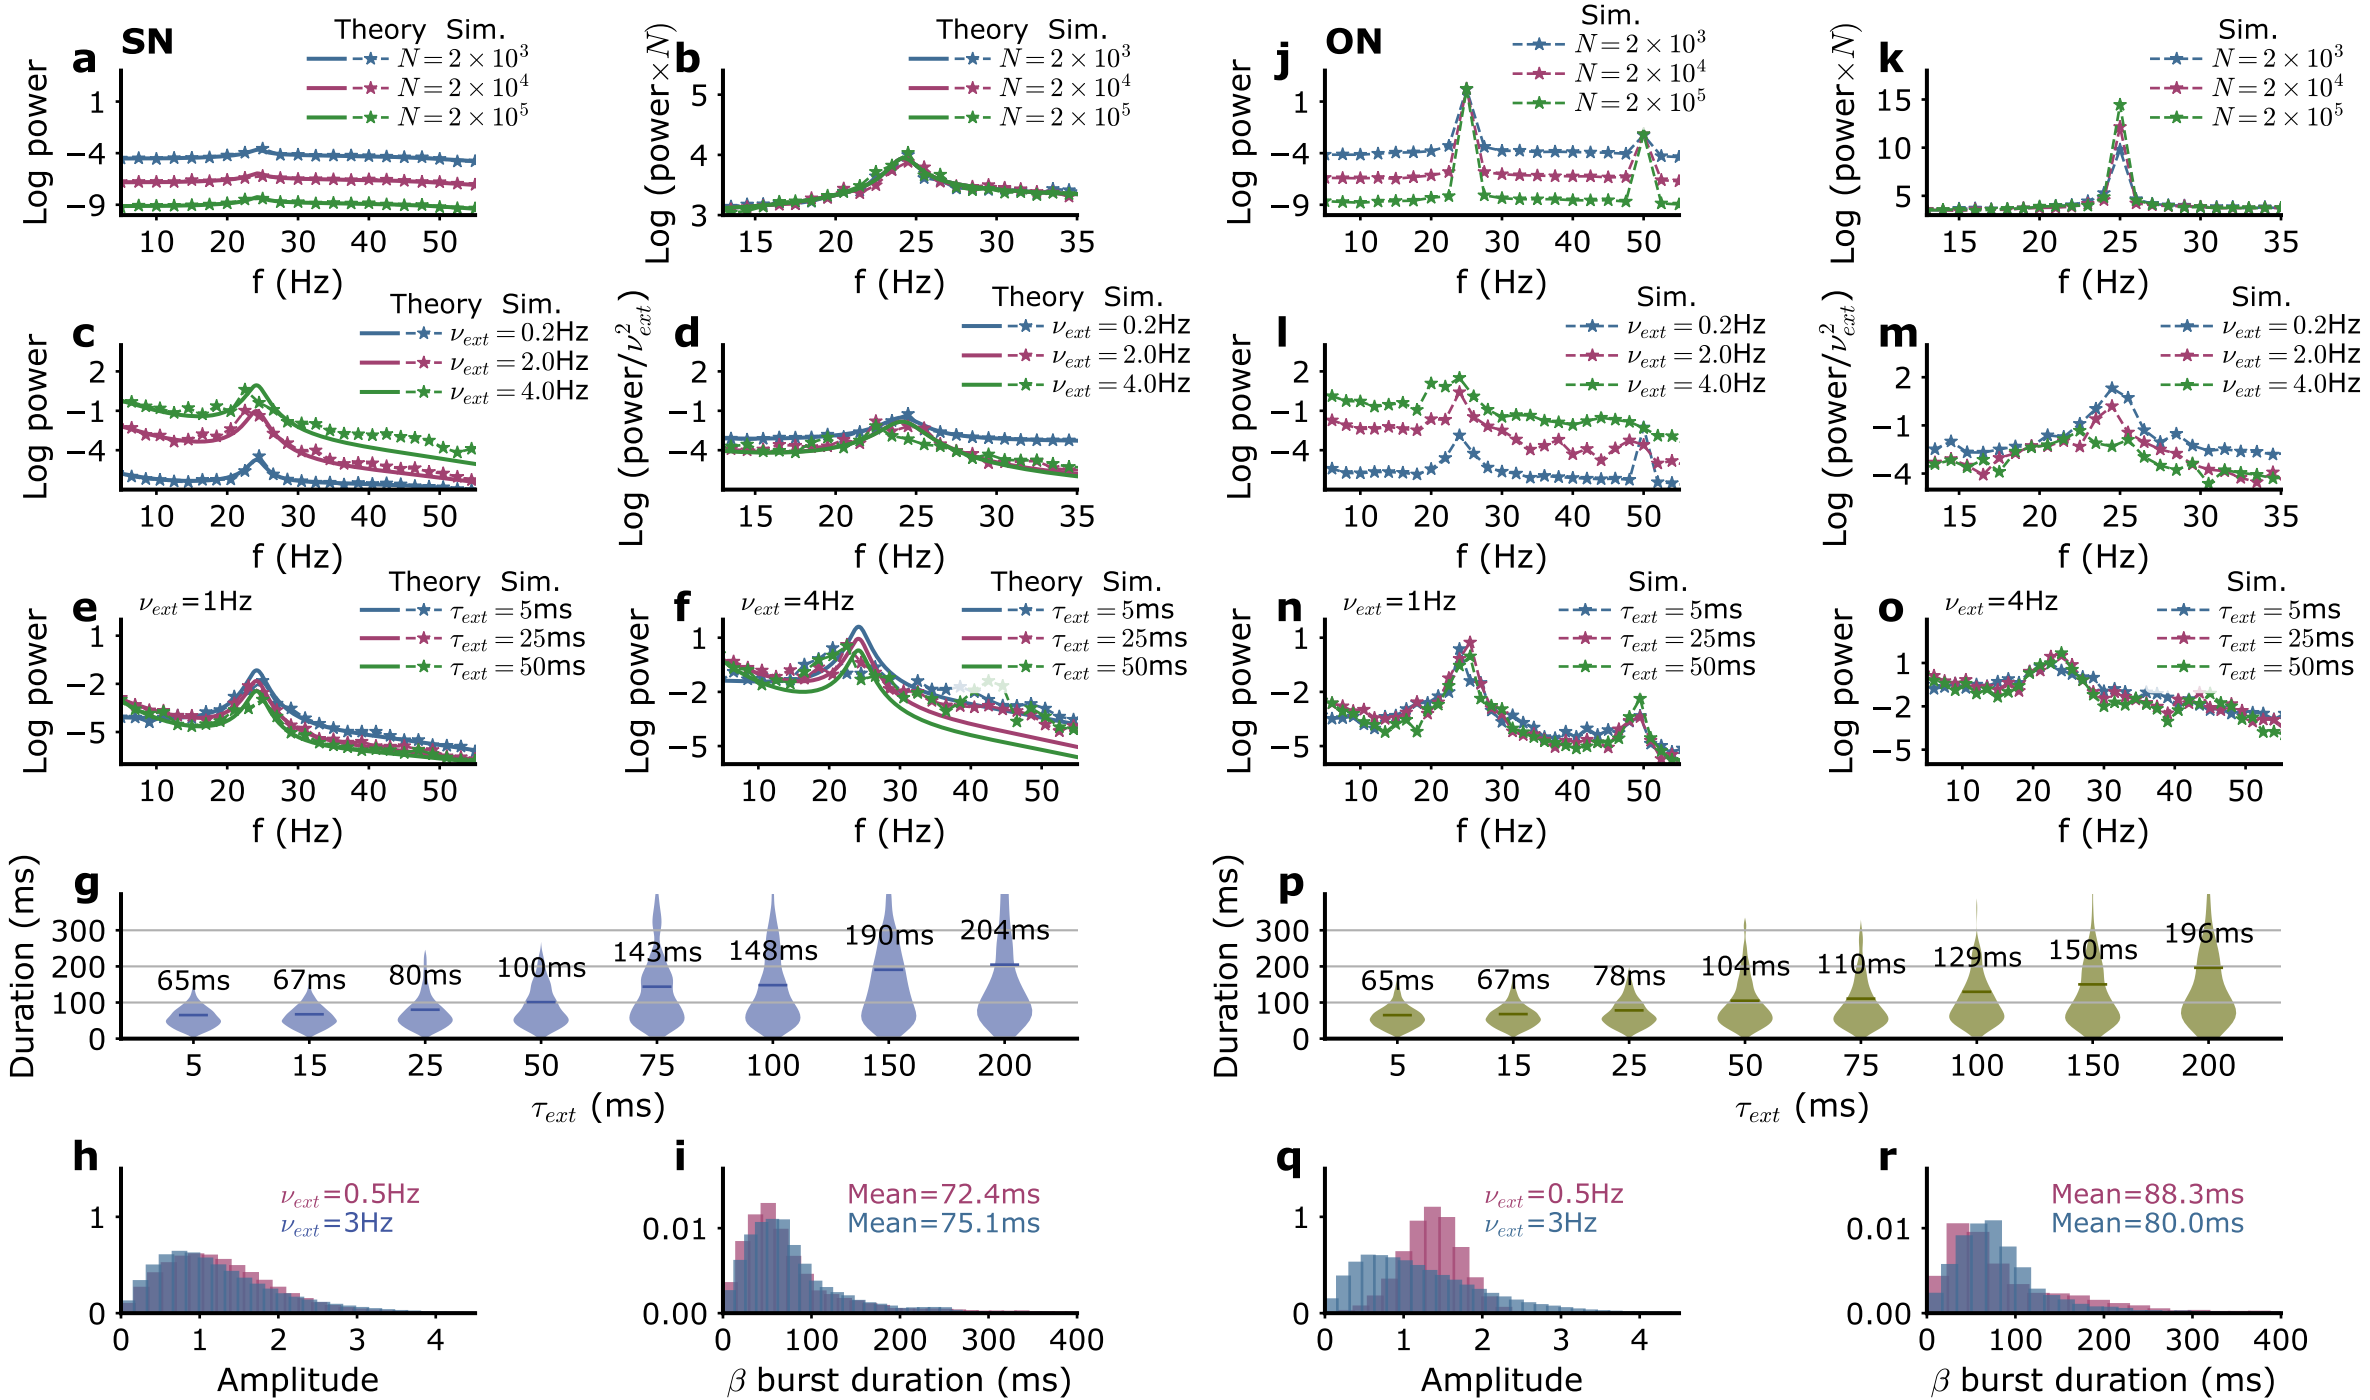

Supplement: supp [file elife_poa_e81446_Figure_2_figure_supplement_3.pdf › elife_poa_e81446_Figure_2_figure_supplement_3.pdf]

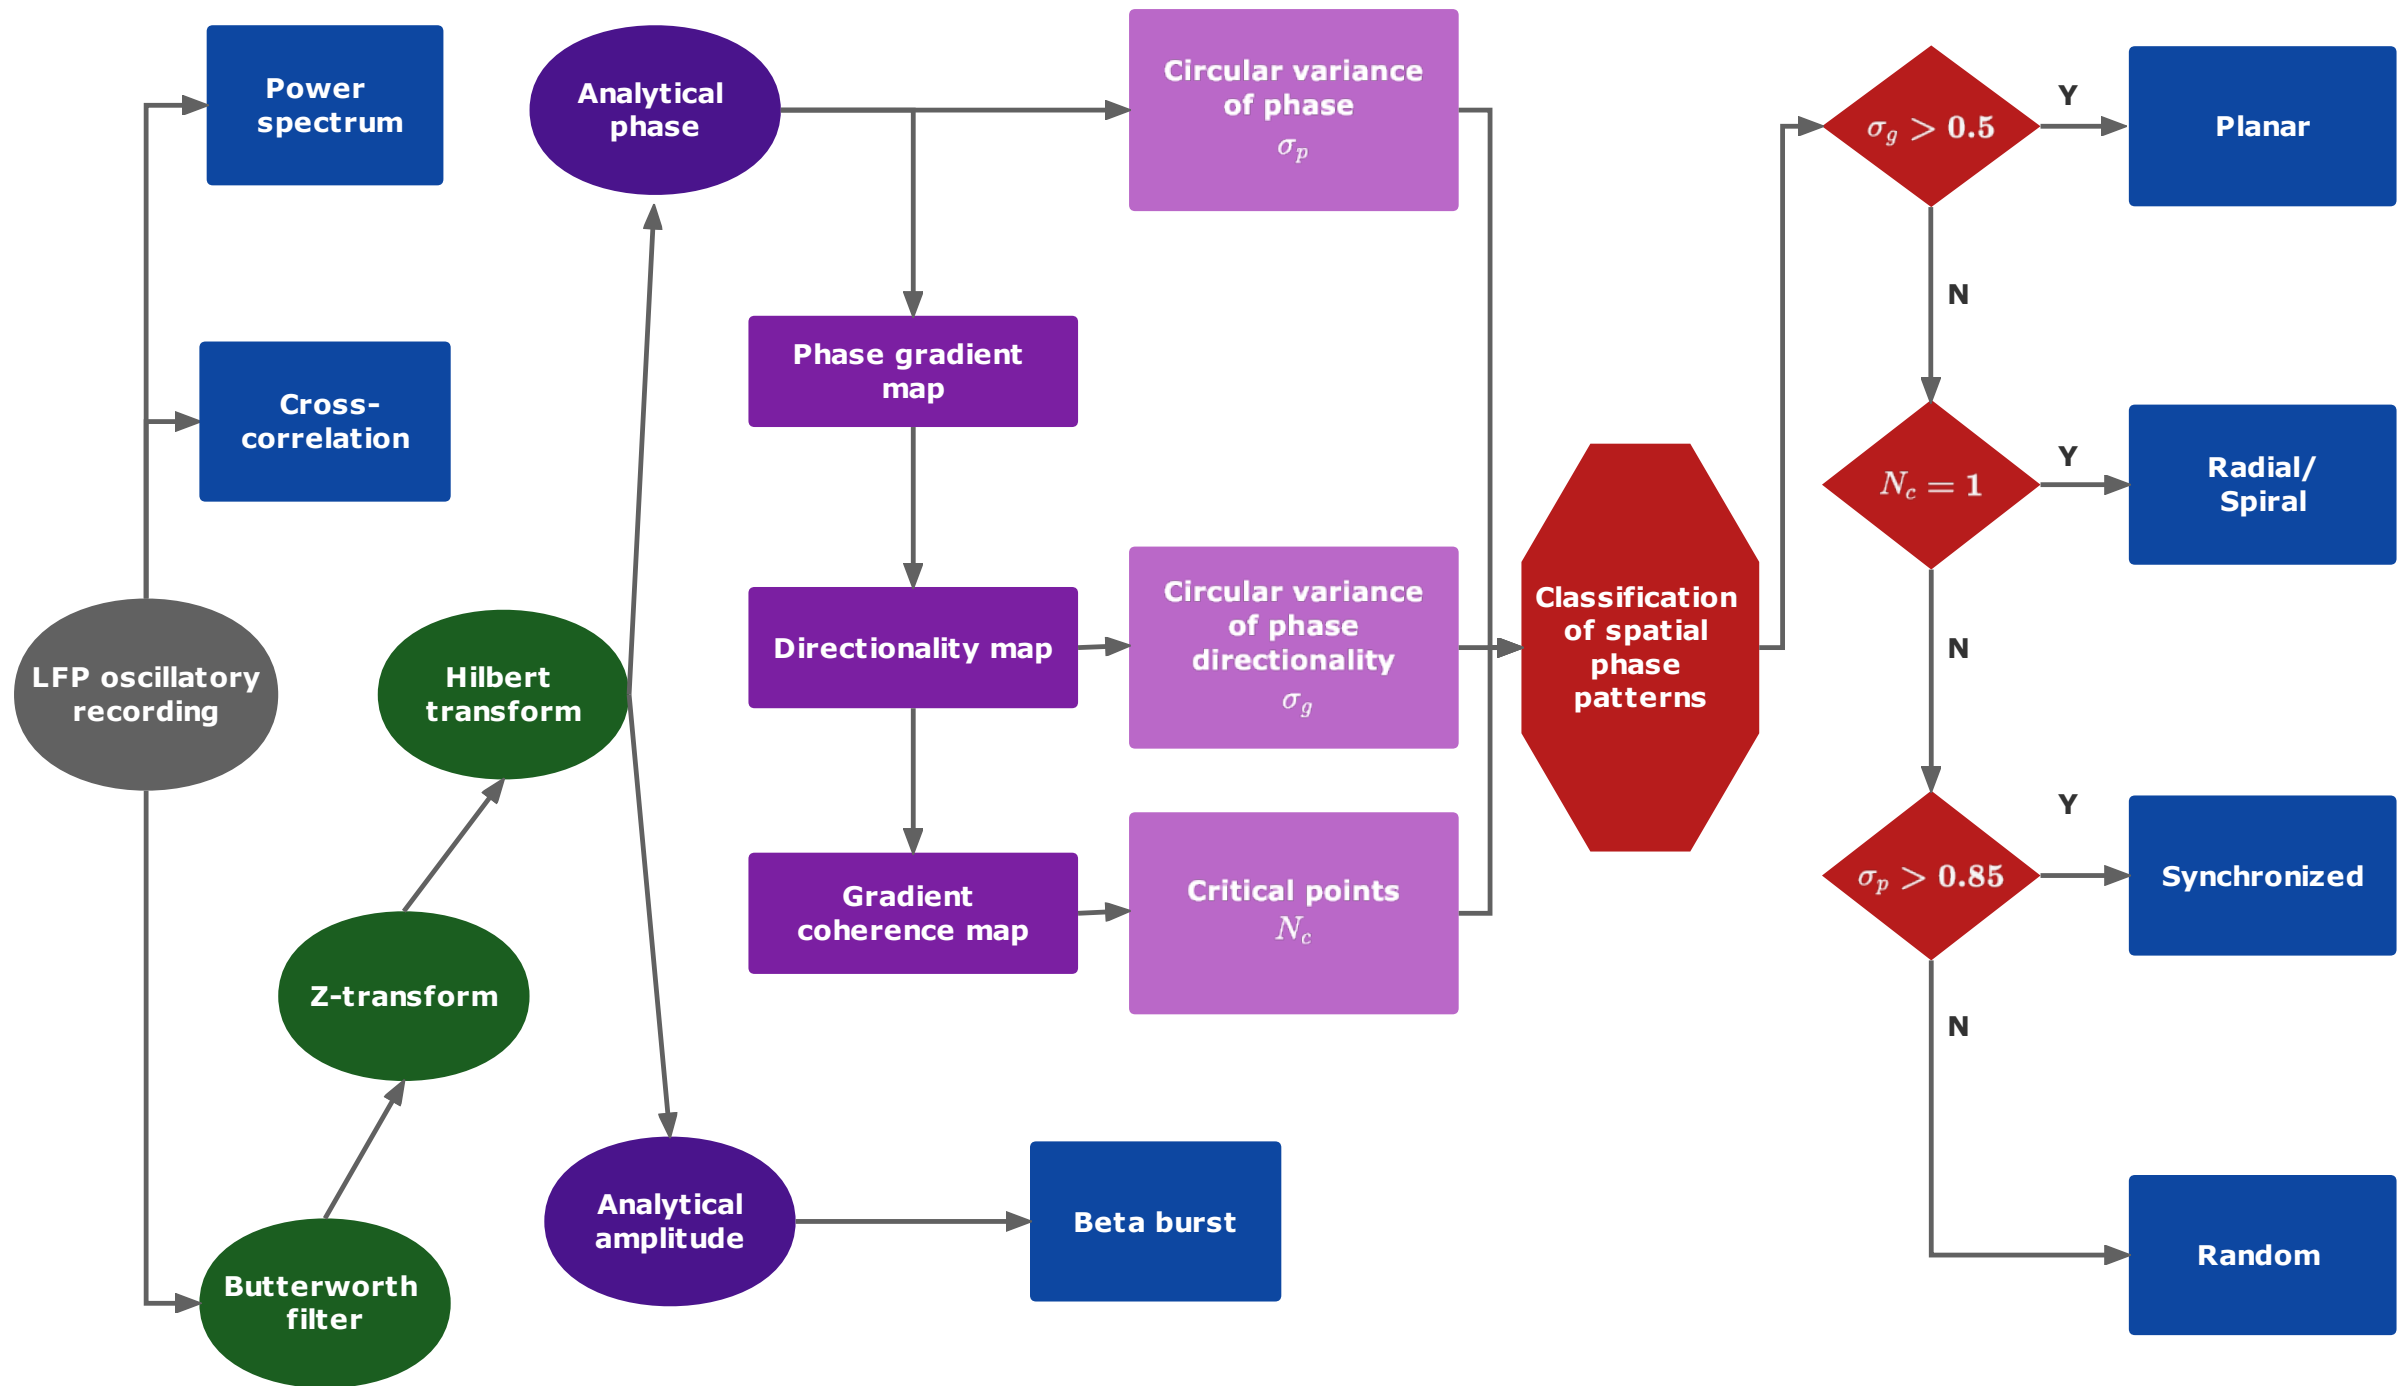

Supplement: supp [file elife_poa_e81446_Figure_3_figure_supplement_1.pdf › elife_poa_e81446_Figure_3_figure_supplement_1.pdf]

# Monkey L

a

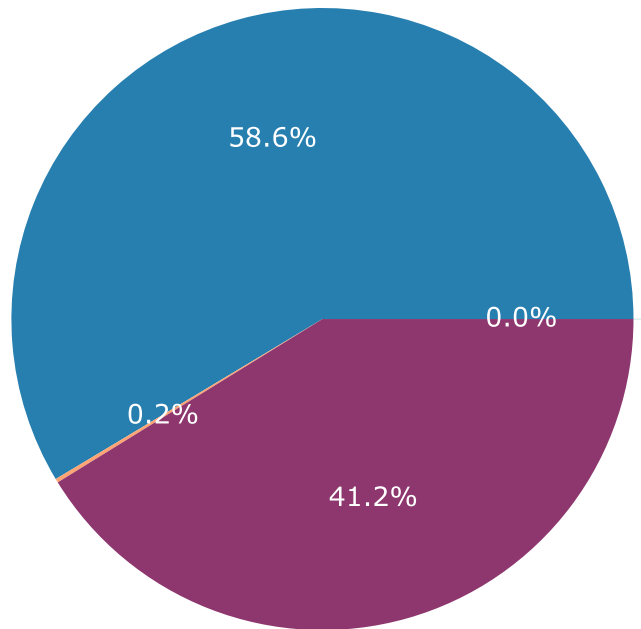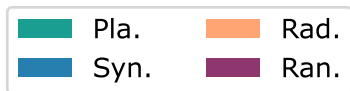

# SN

b

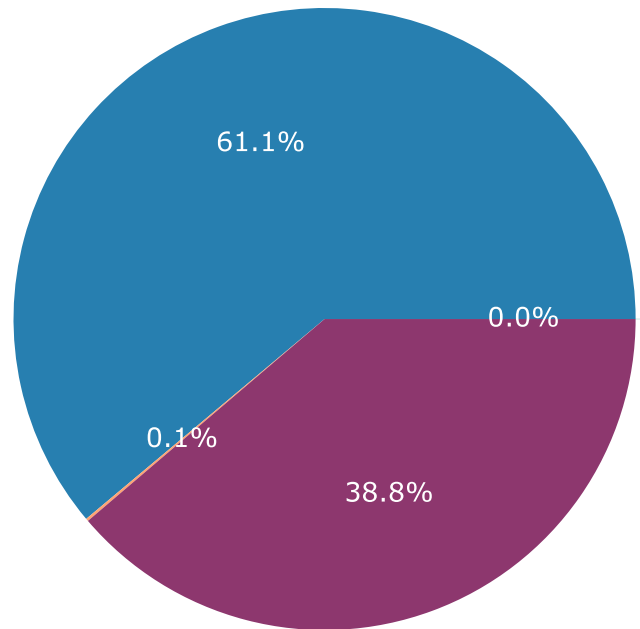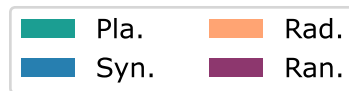

Supplement: supp [file elife_poa_e81446_Figure_3_figure_supplement_10.pdf › elife_poa_e81446_Figure_3_figure_supplement_10.pdf]

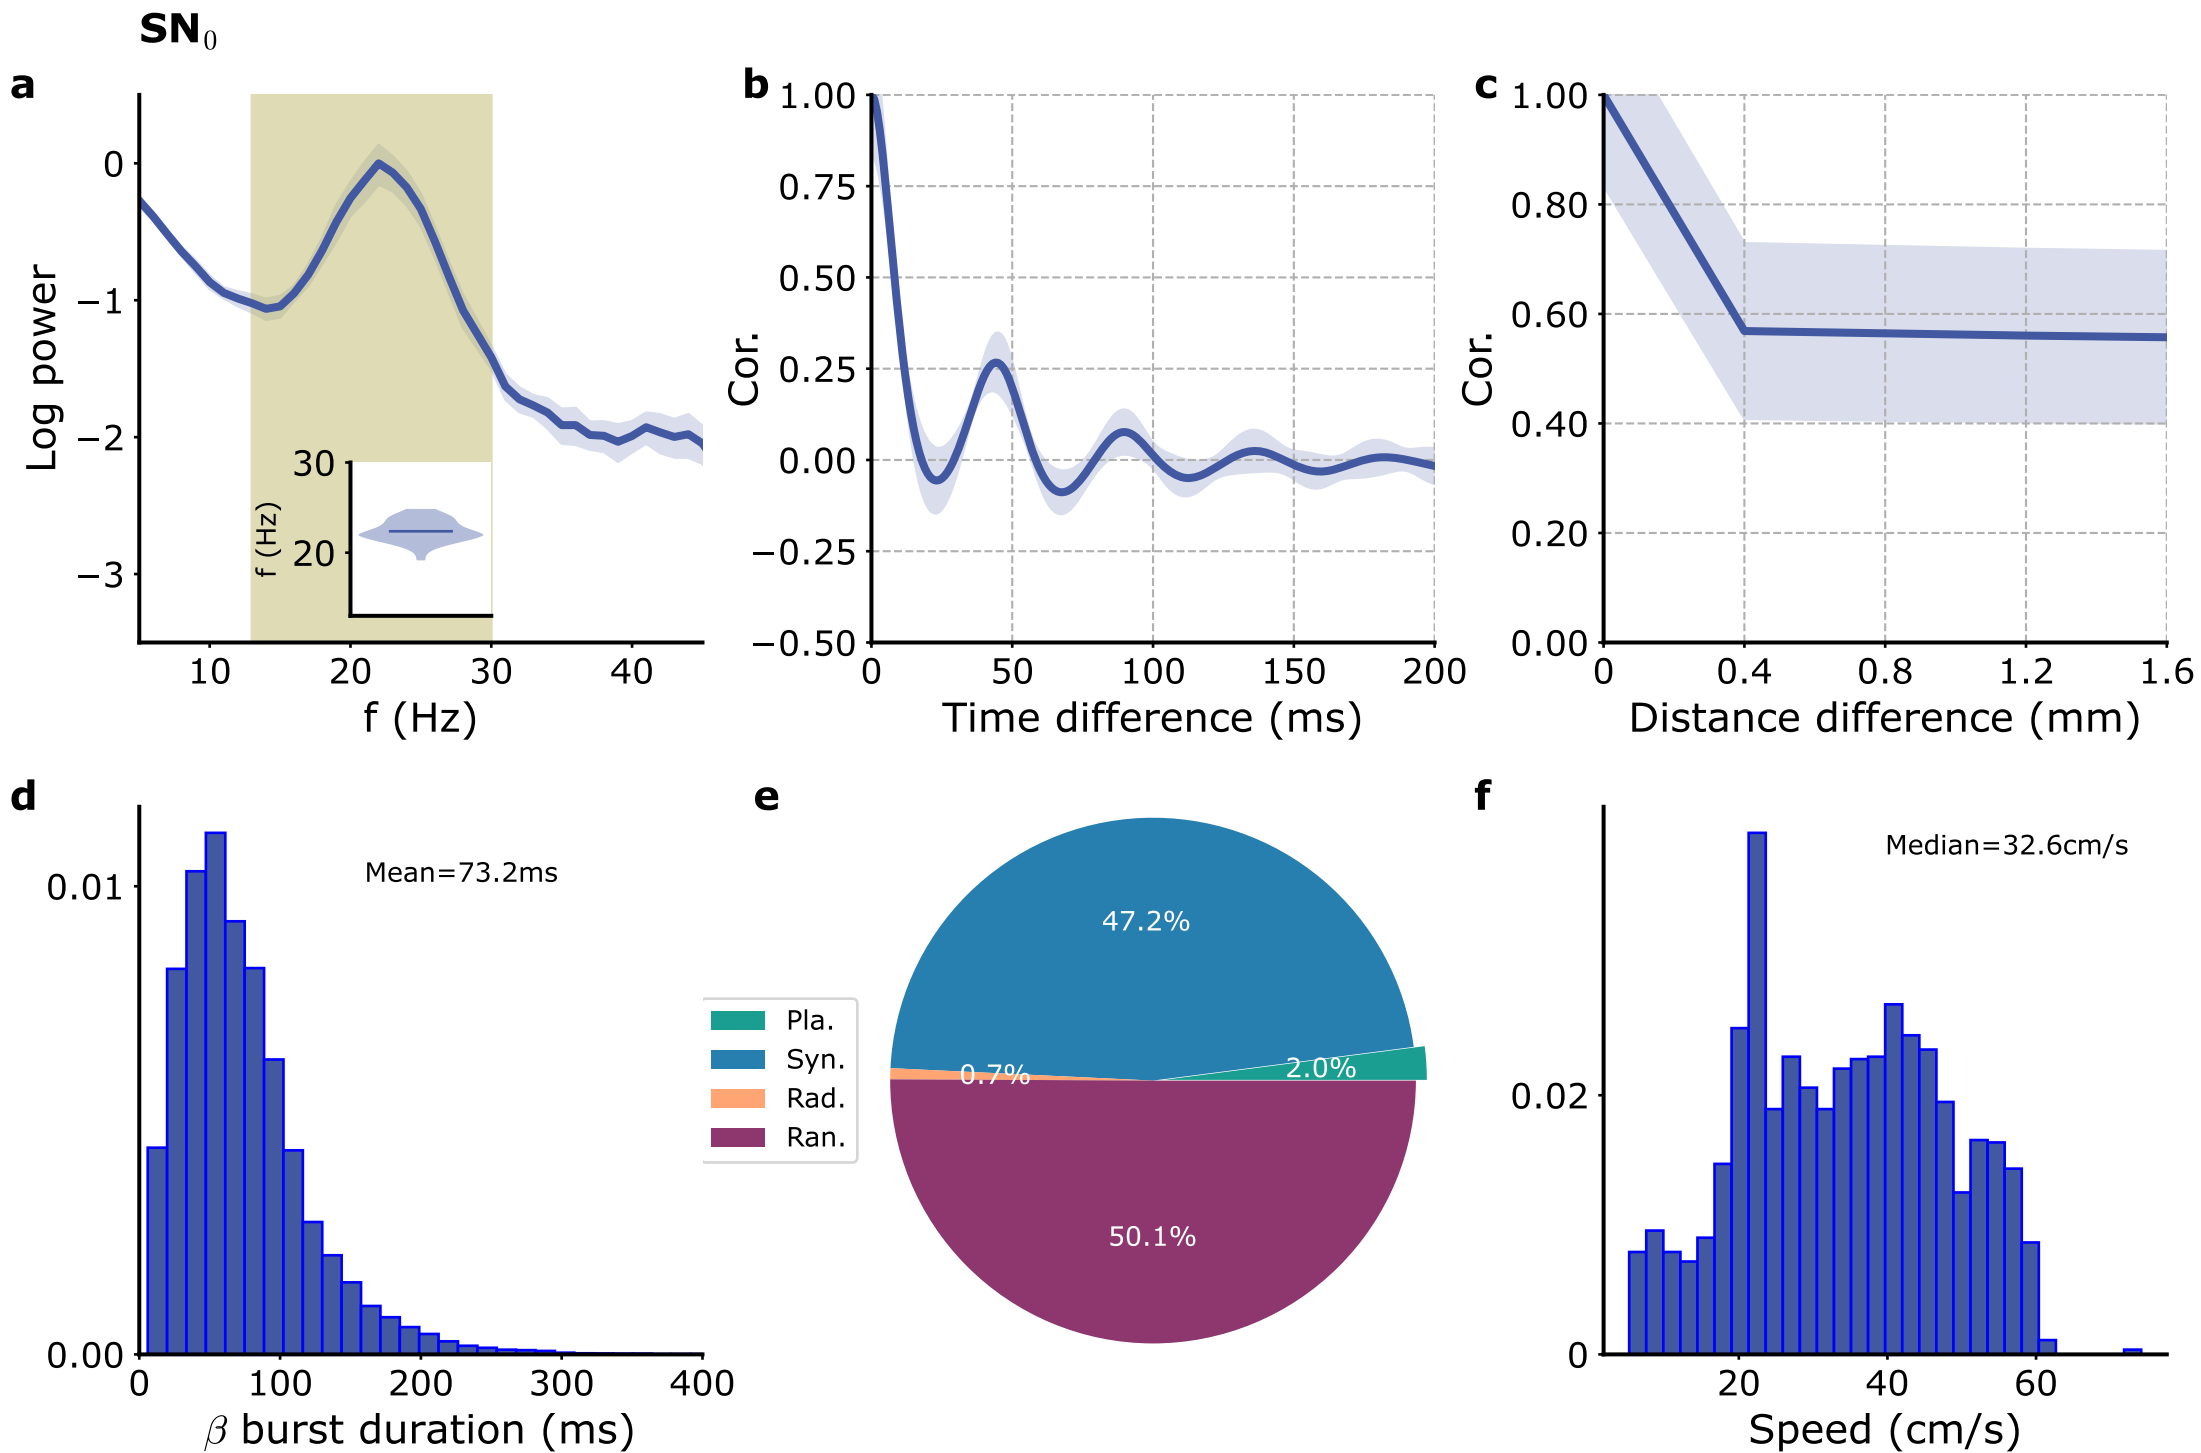

Supplement: supp [file elife_poa_e81446_Figure_3_figure_supplement_11.pdf › elife_poa_e81446_Figure_3_figure_supplement_11.pdf]

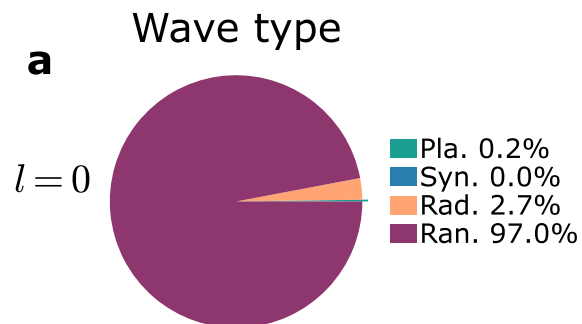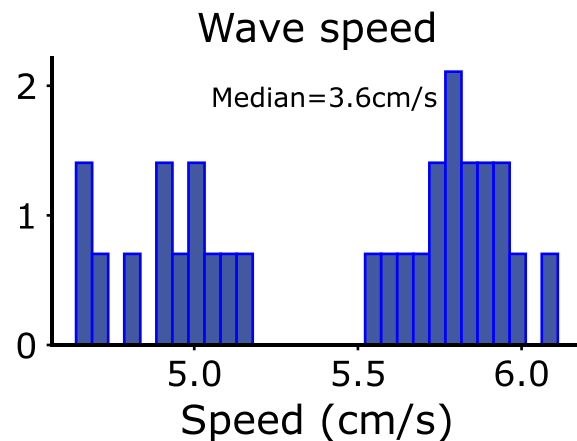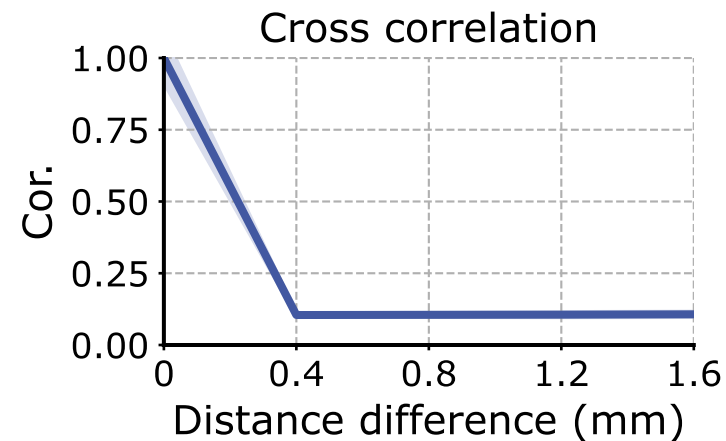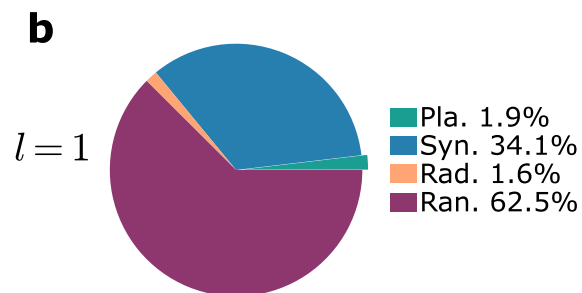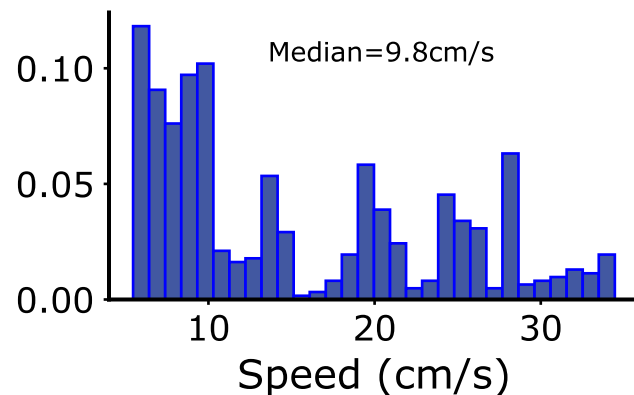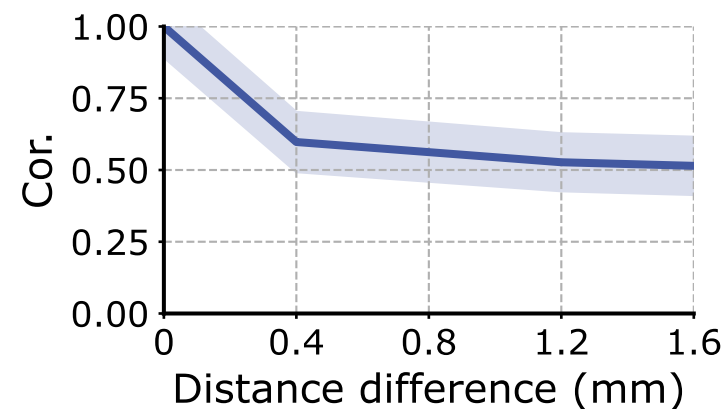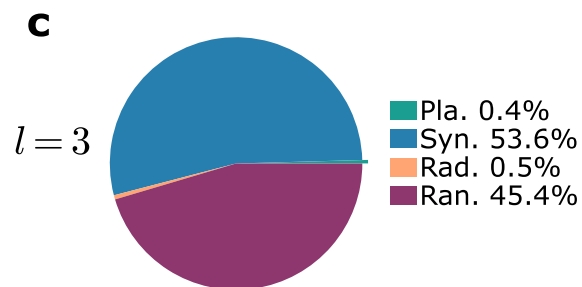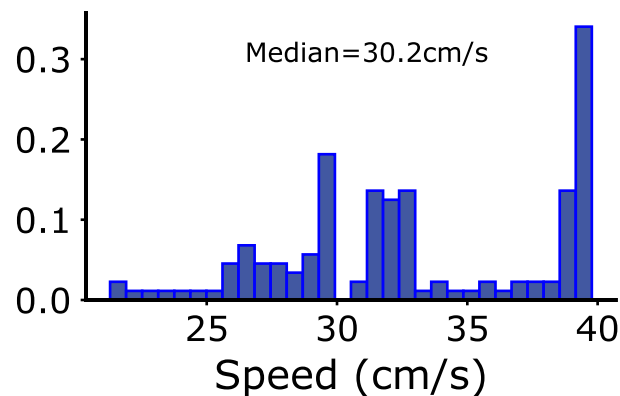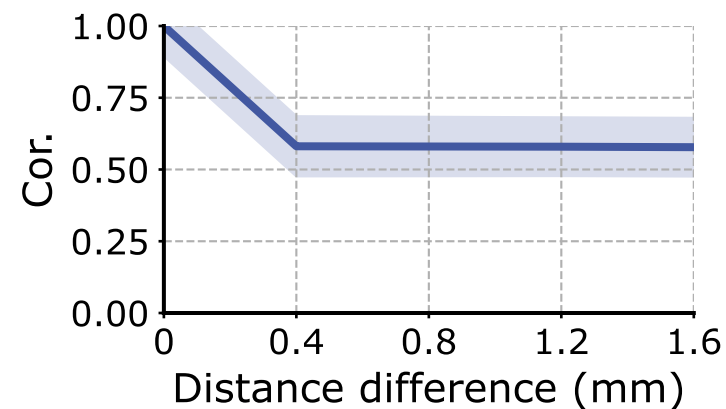

Supplement: supp [file elife_poa_e81446_Figure_3_figure_supplement_12.pdf › elife_poa_e81446_Figure_3_figure_supplement_12.pdf]

# Monkey N

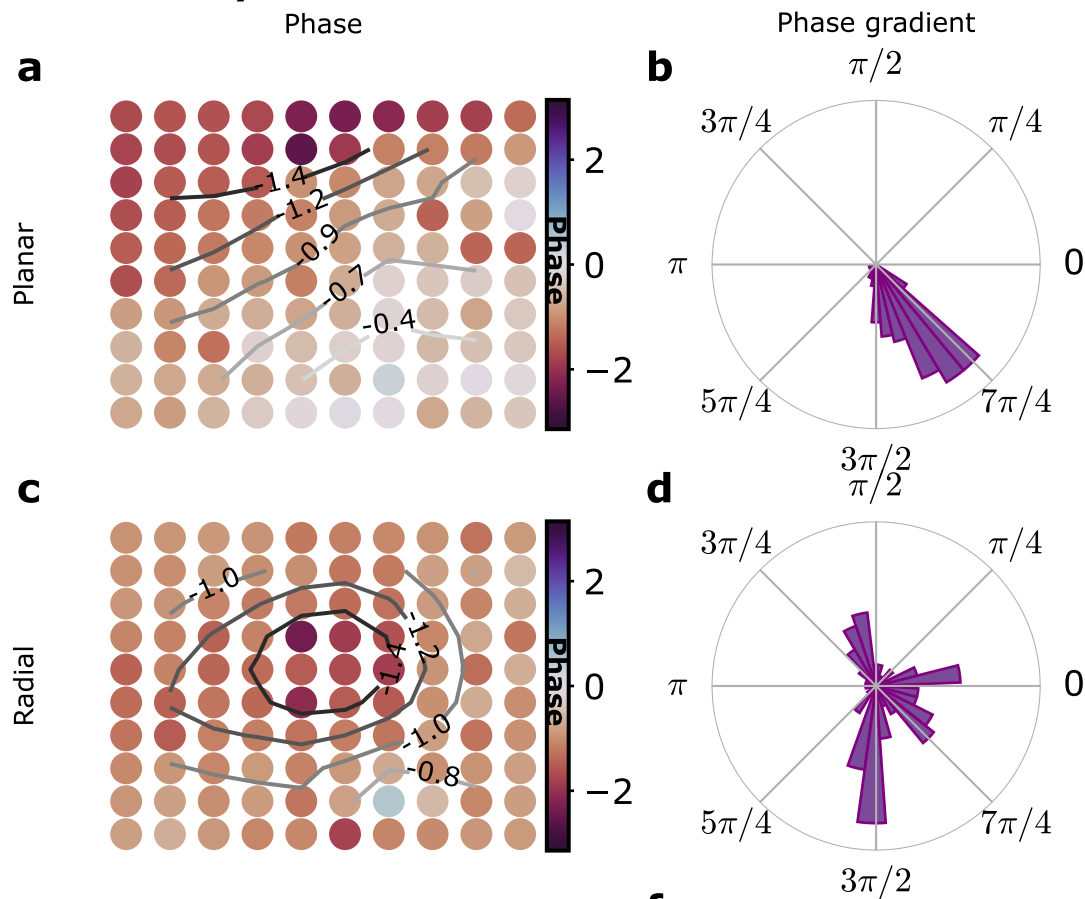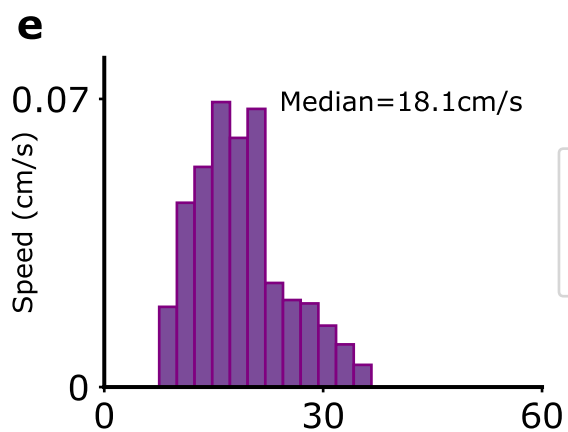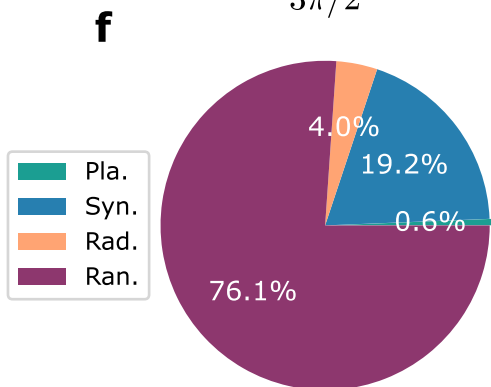

# SN'

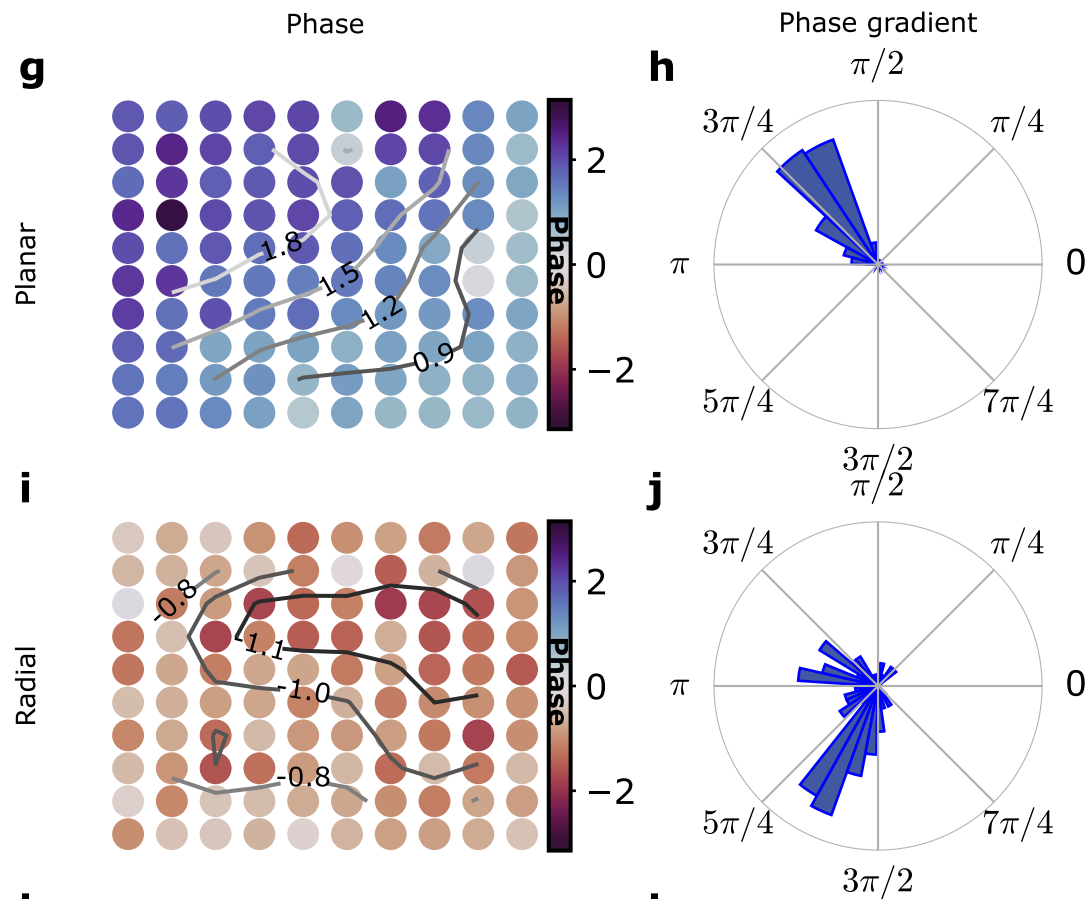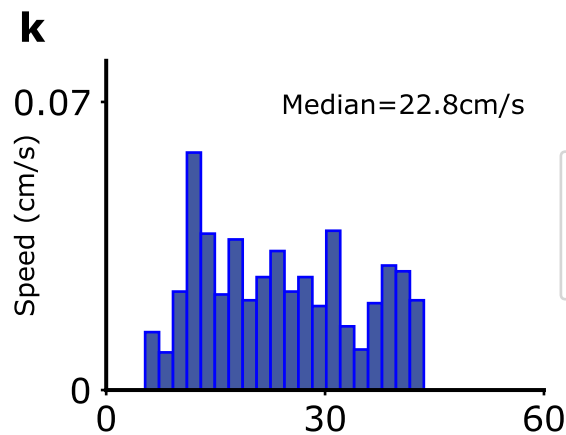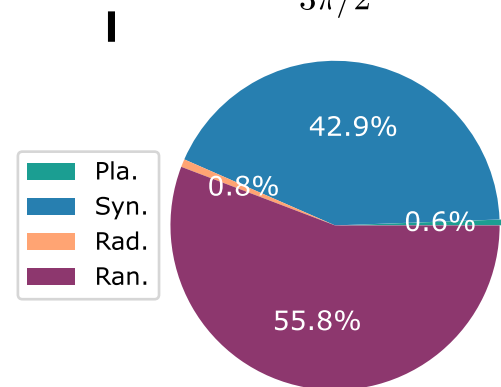

Supplement: supp [file elife_poa_e81446_Figure_3_figure_supplement_2.pdf › elife_poa_e81446_Figure_3_figure_supplement_2.pdf]

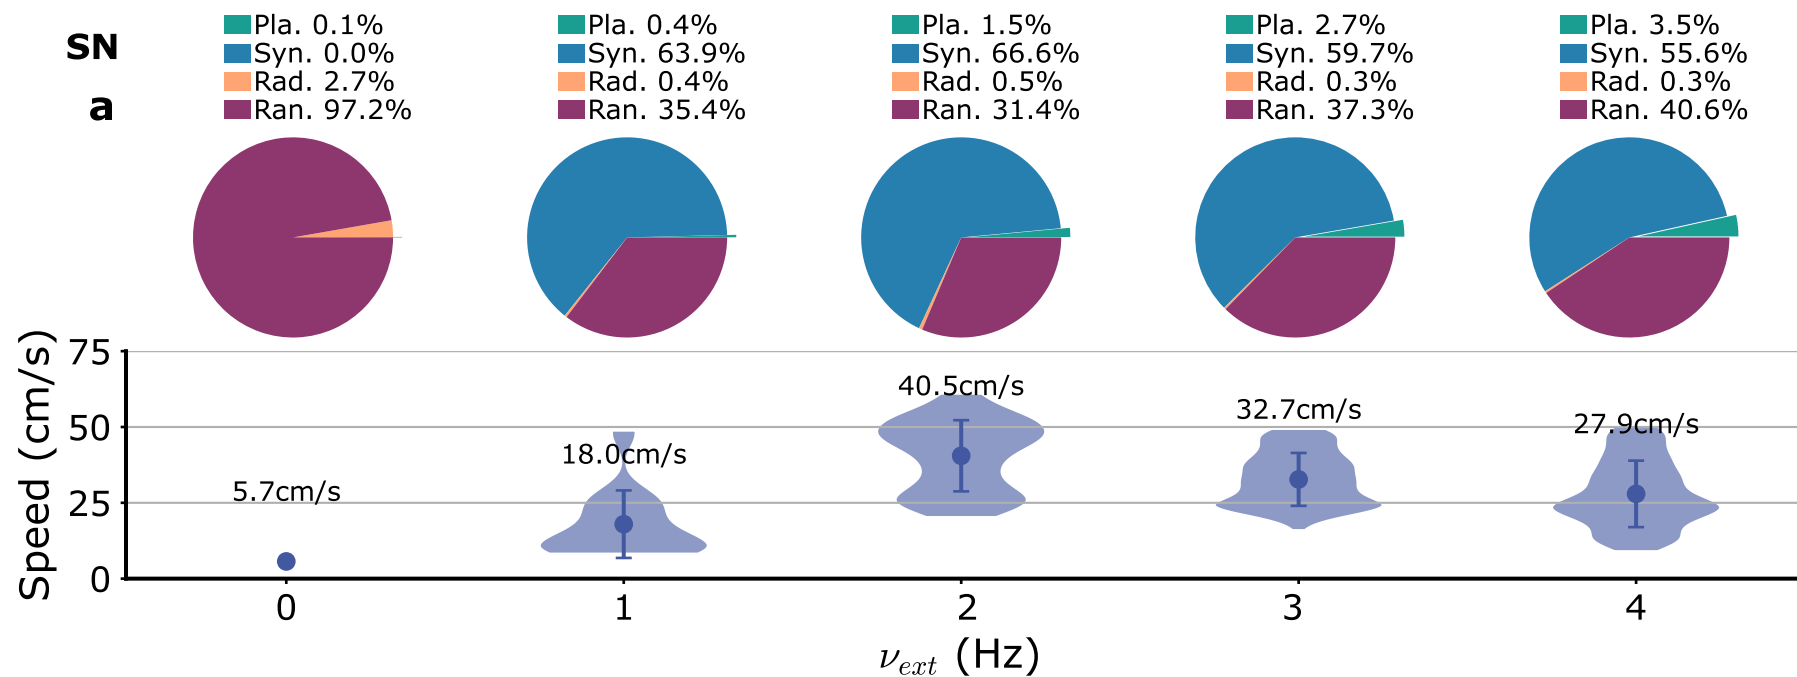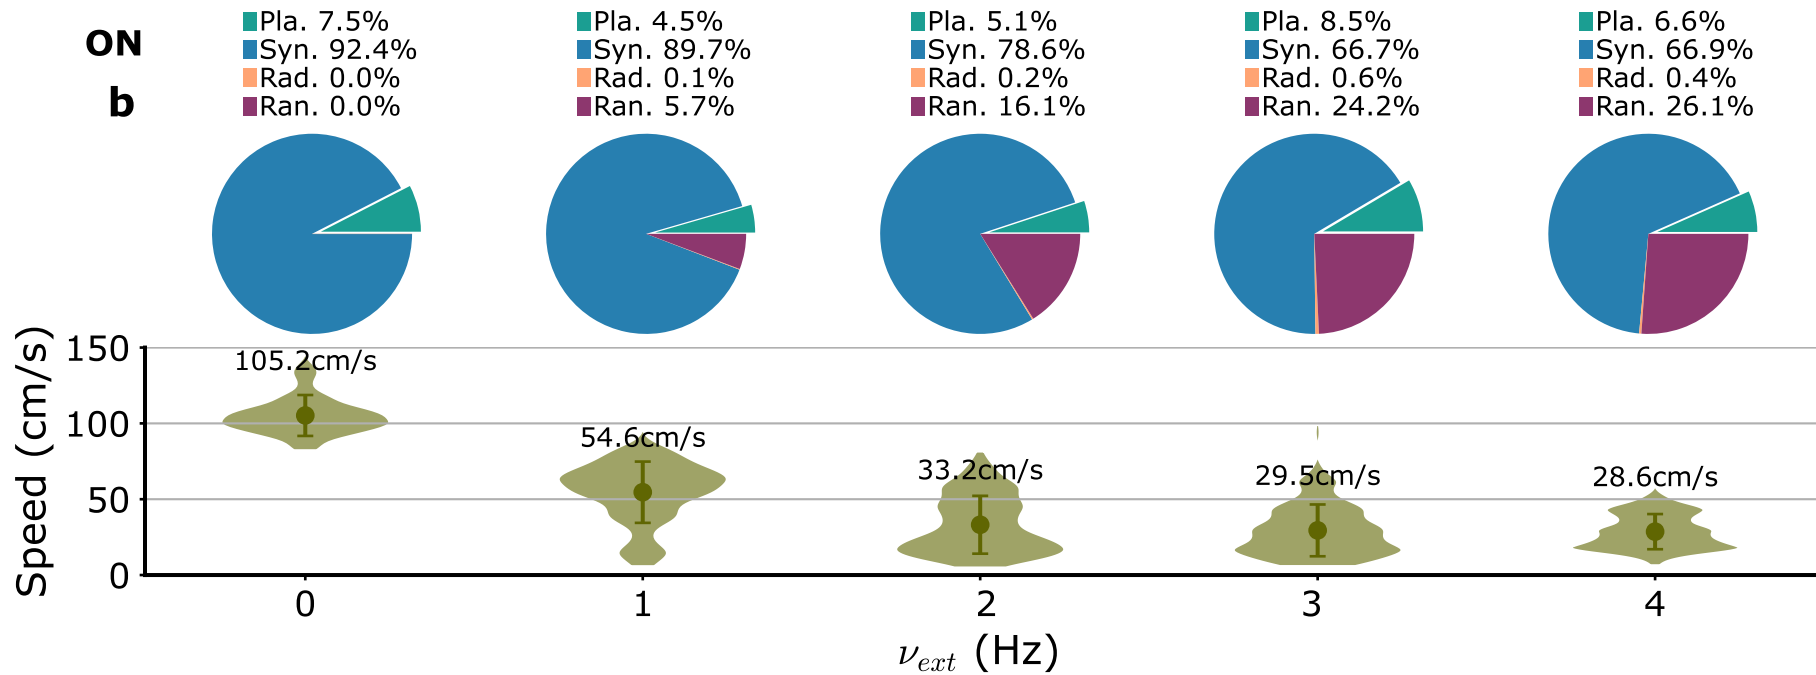

Supplement: supp [file elife_poa_e81446_Figure_3_figure_supplement_3.pdf › elife_poa_e81446_Figure_3_figure_supplement_3.pdf]

# Monkey L

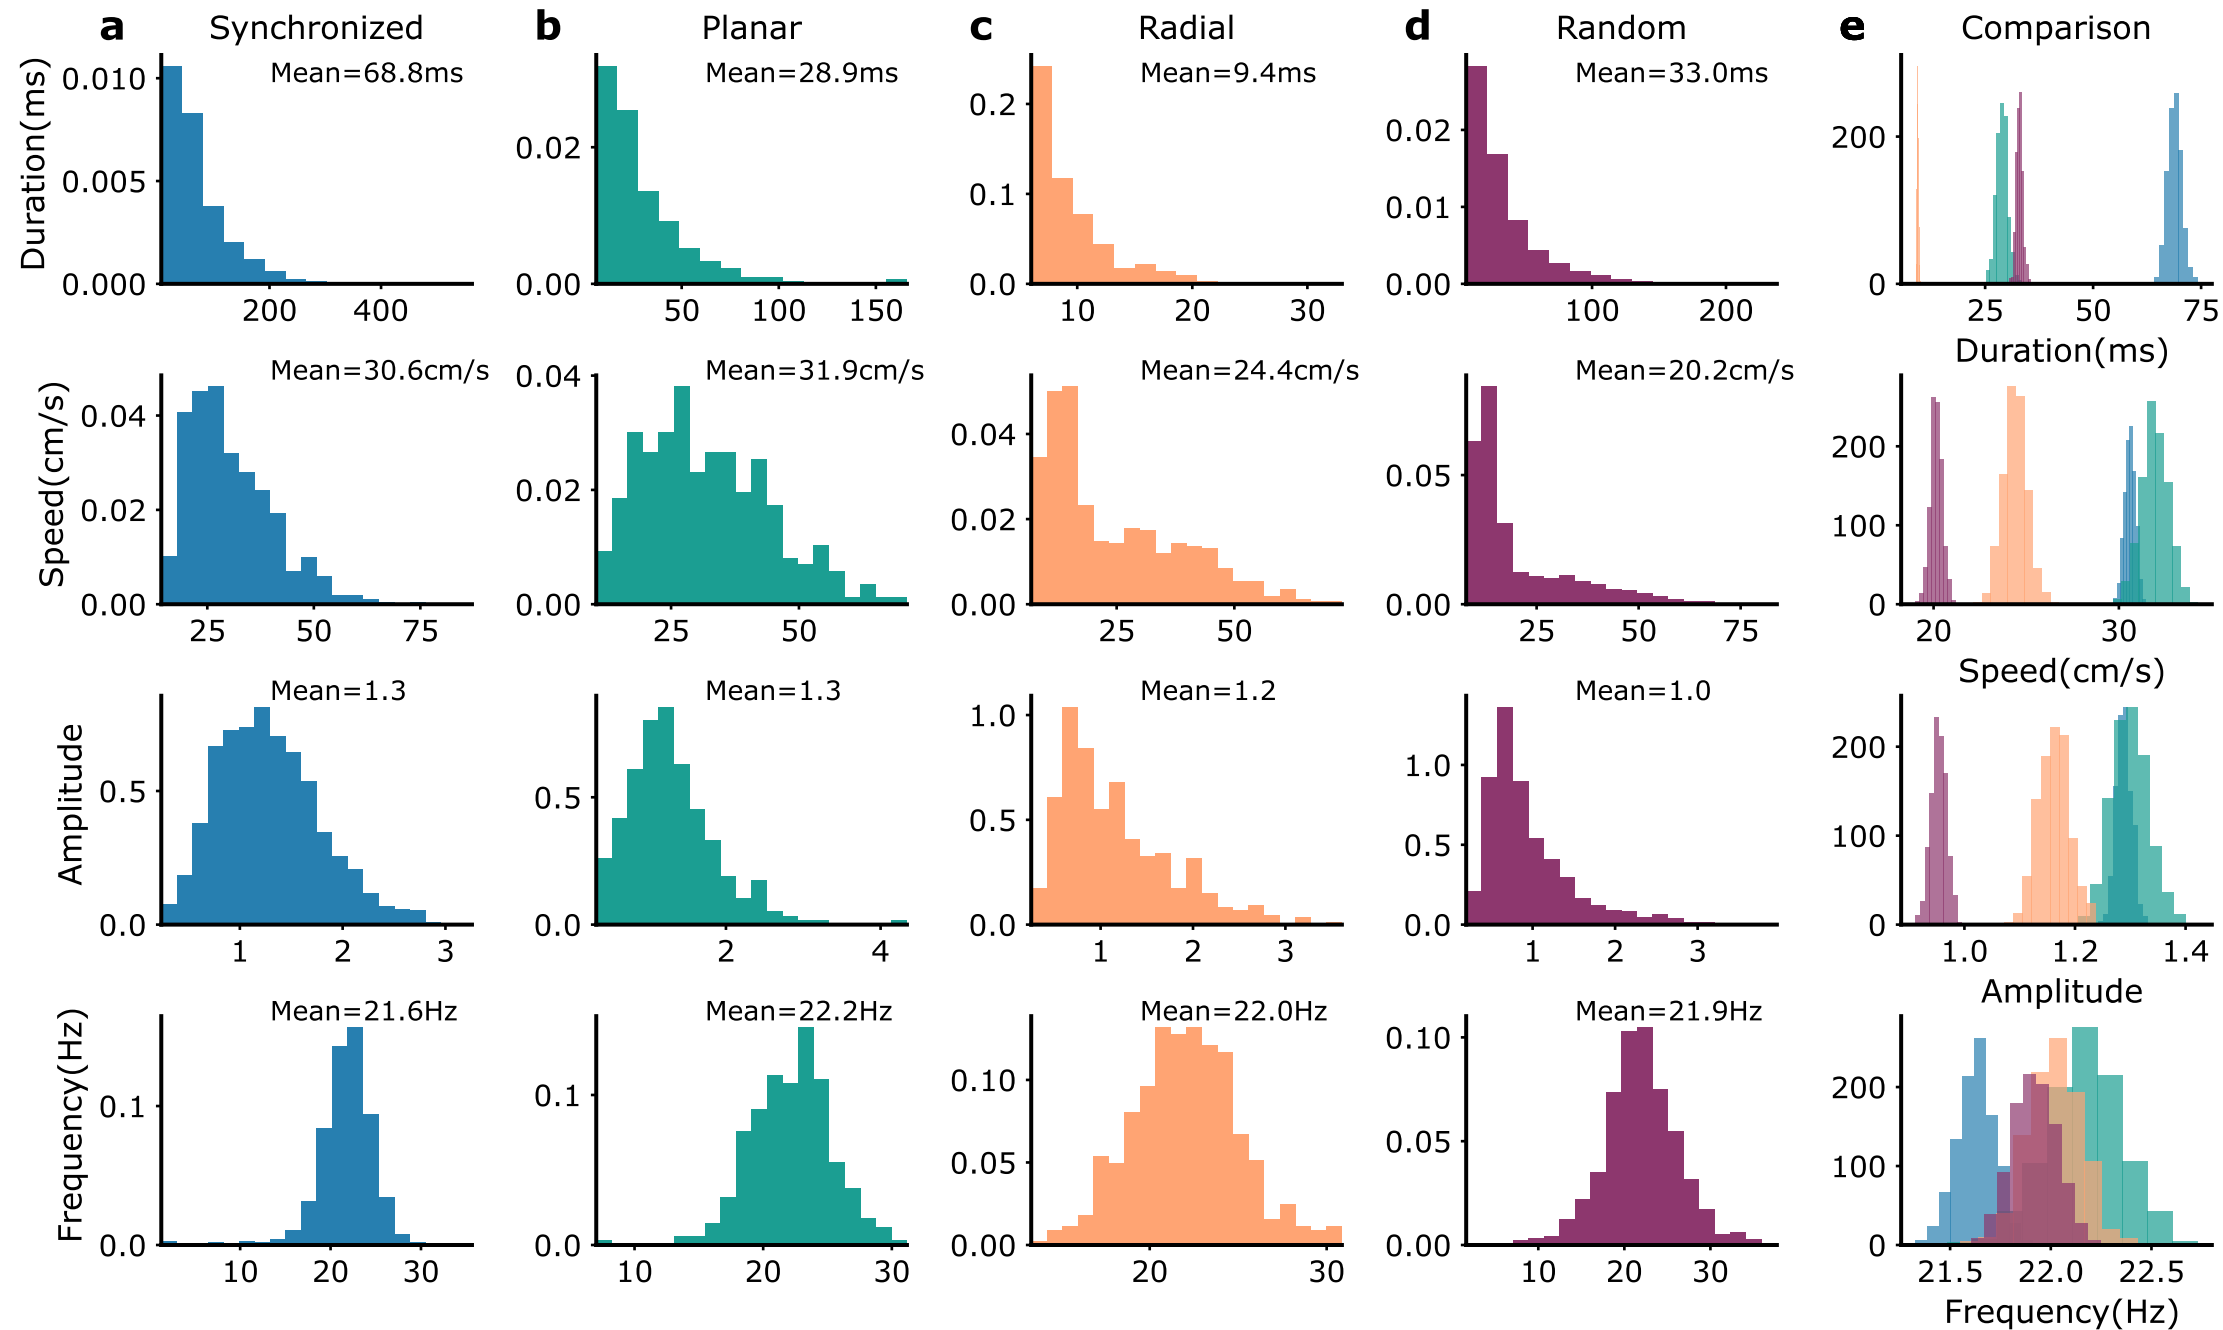

Supplement: supp [file elife_poa_e81446_Figure_3_figure_supplement_4.pdf › elife_poa_e81446_Figure_3_figure_supplement_4.pdf]

# SN

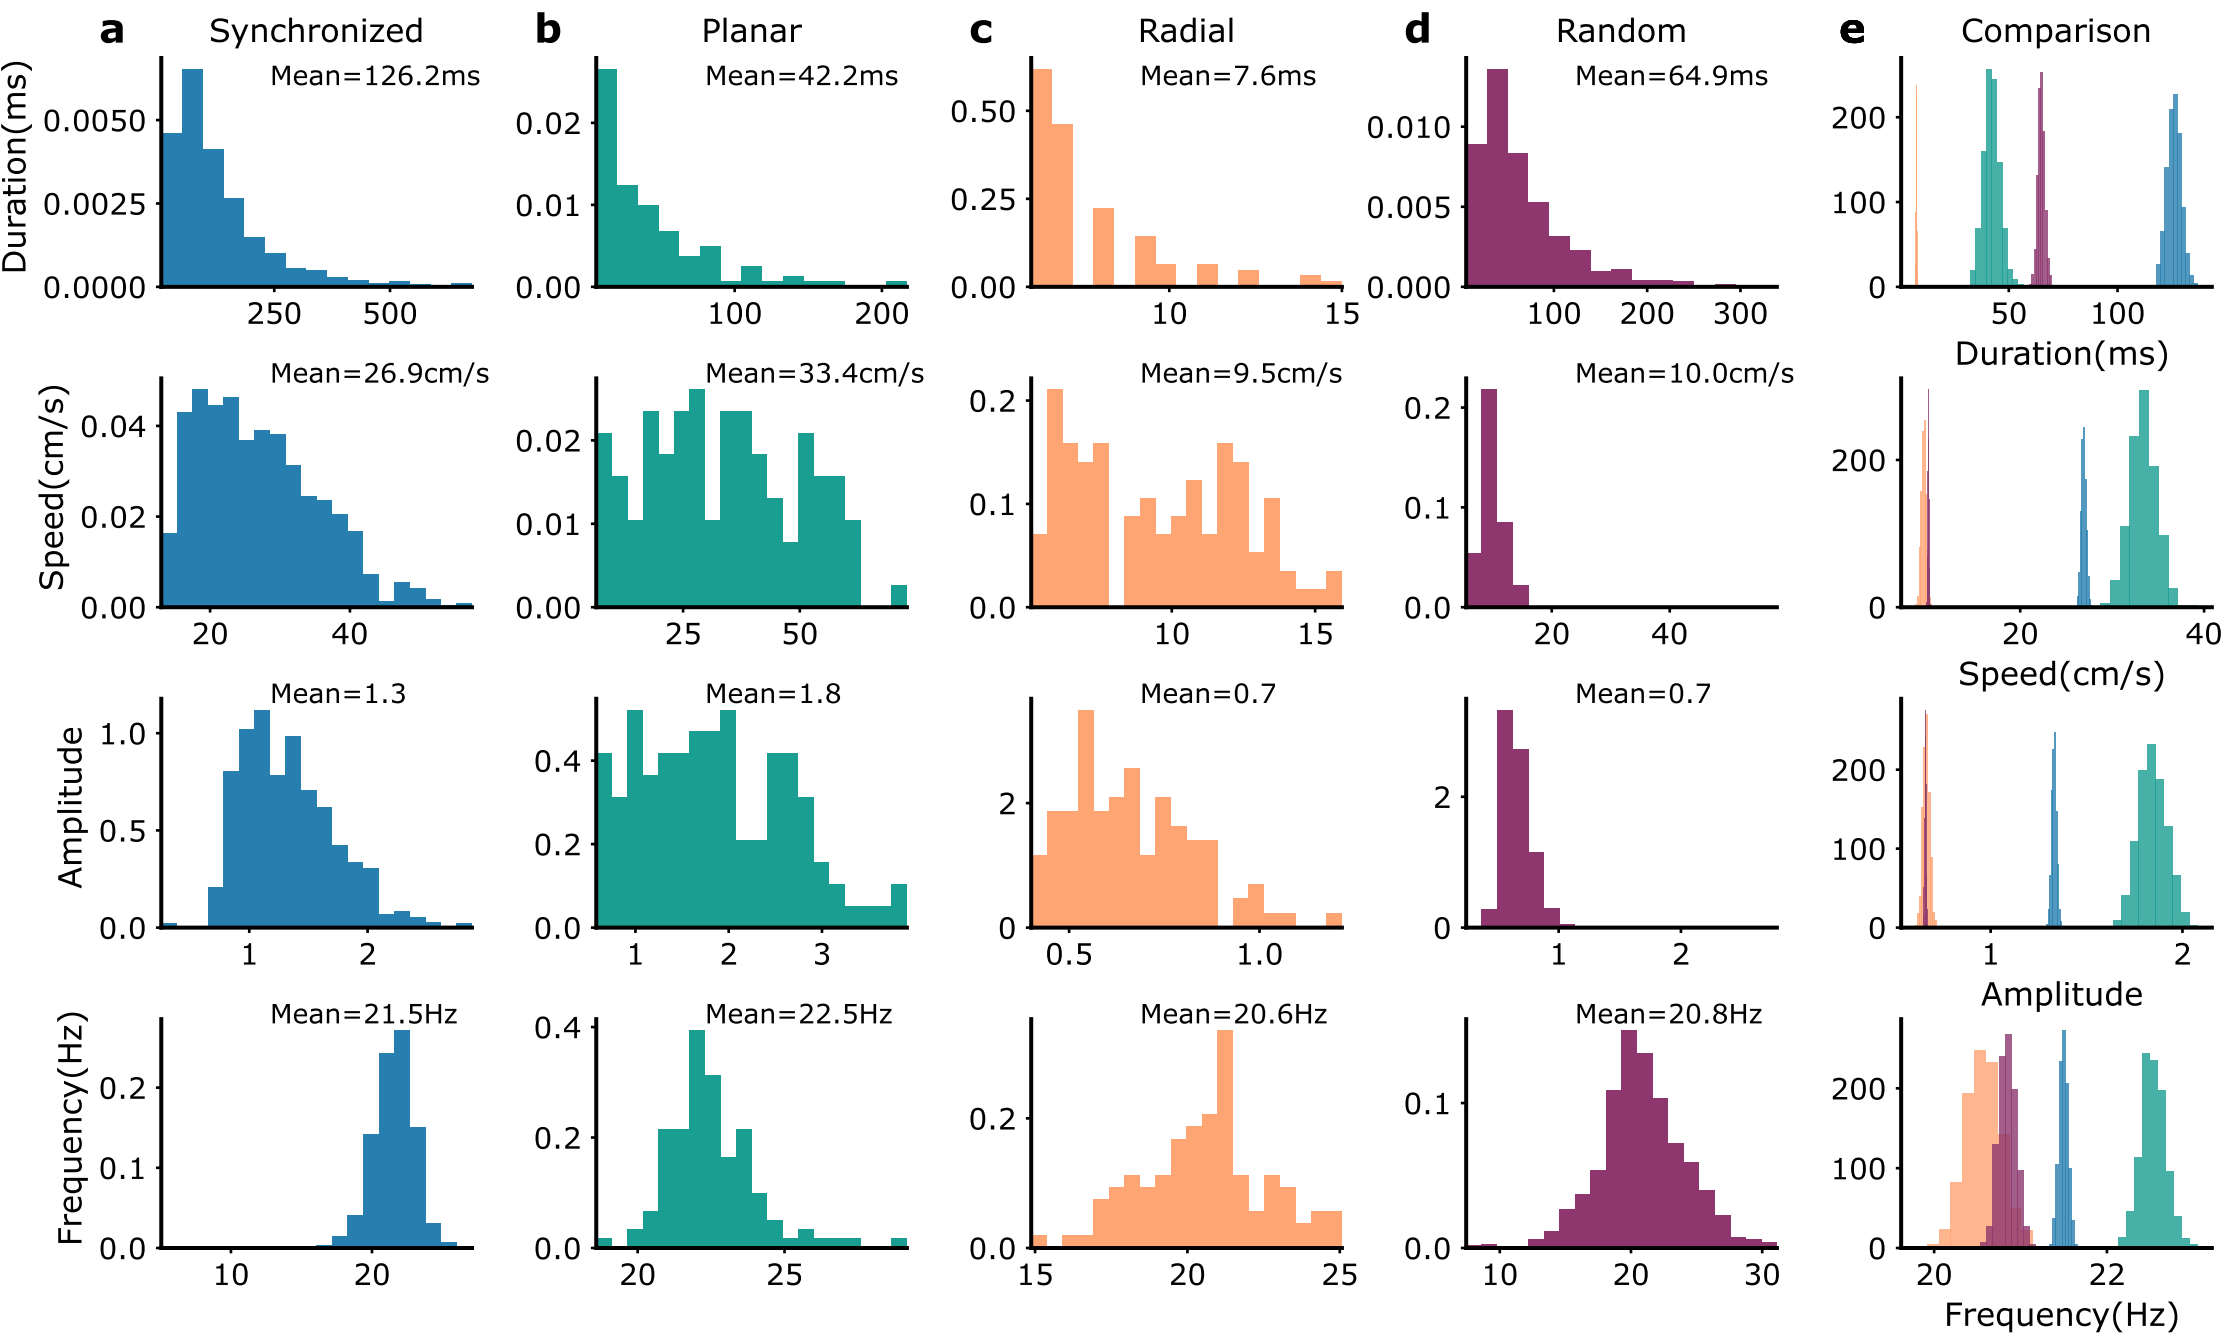

Supplement: supp [file elife_poa_e81446_Figure_3_figure_supplement_5.pdf › elife_poa_e81446_Figure_3_figure_supplement_5.pdf]

# Monkey N

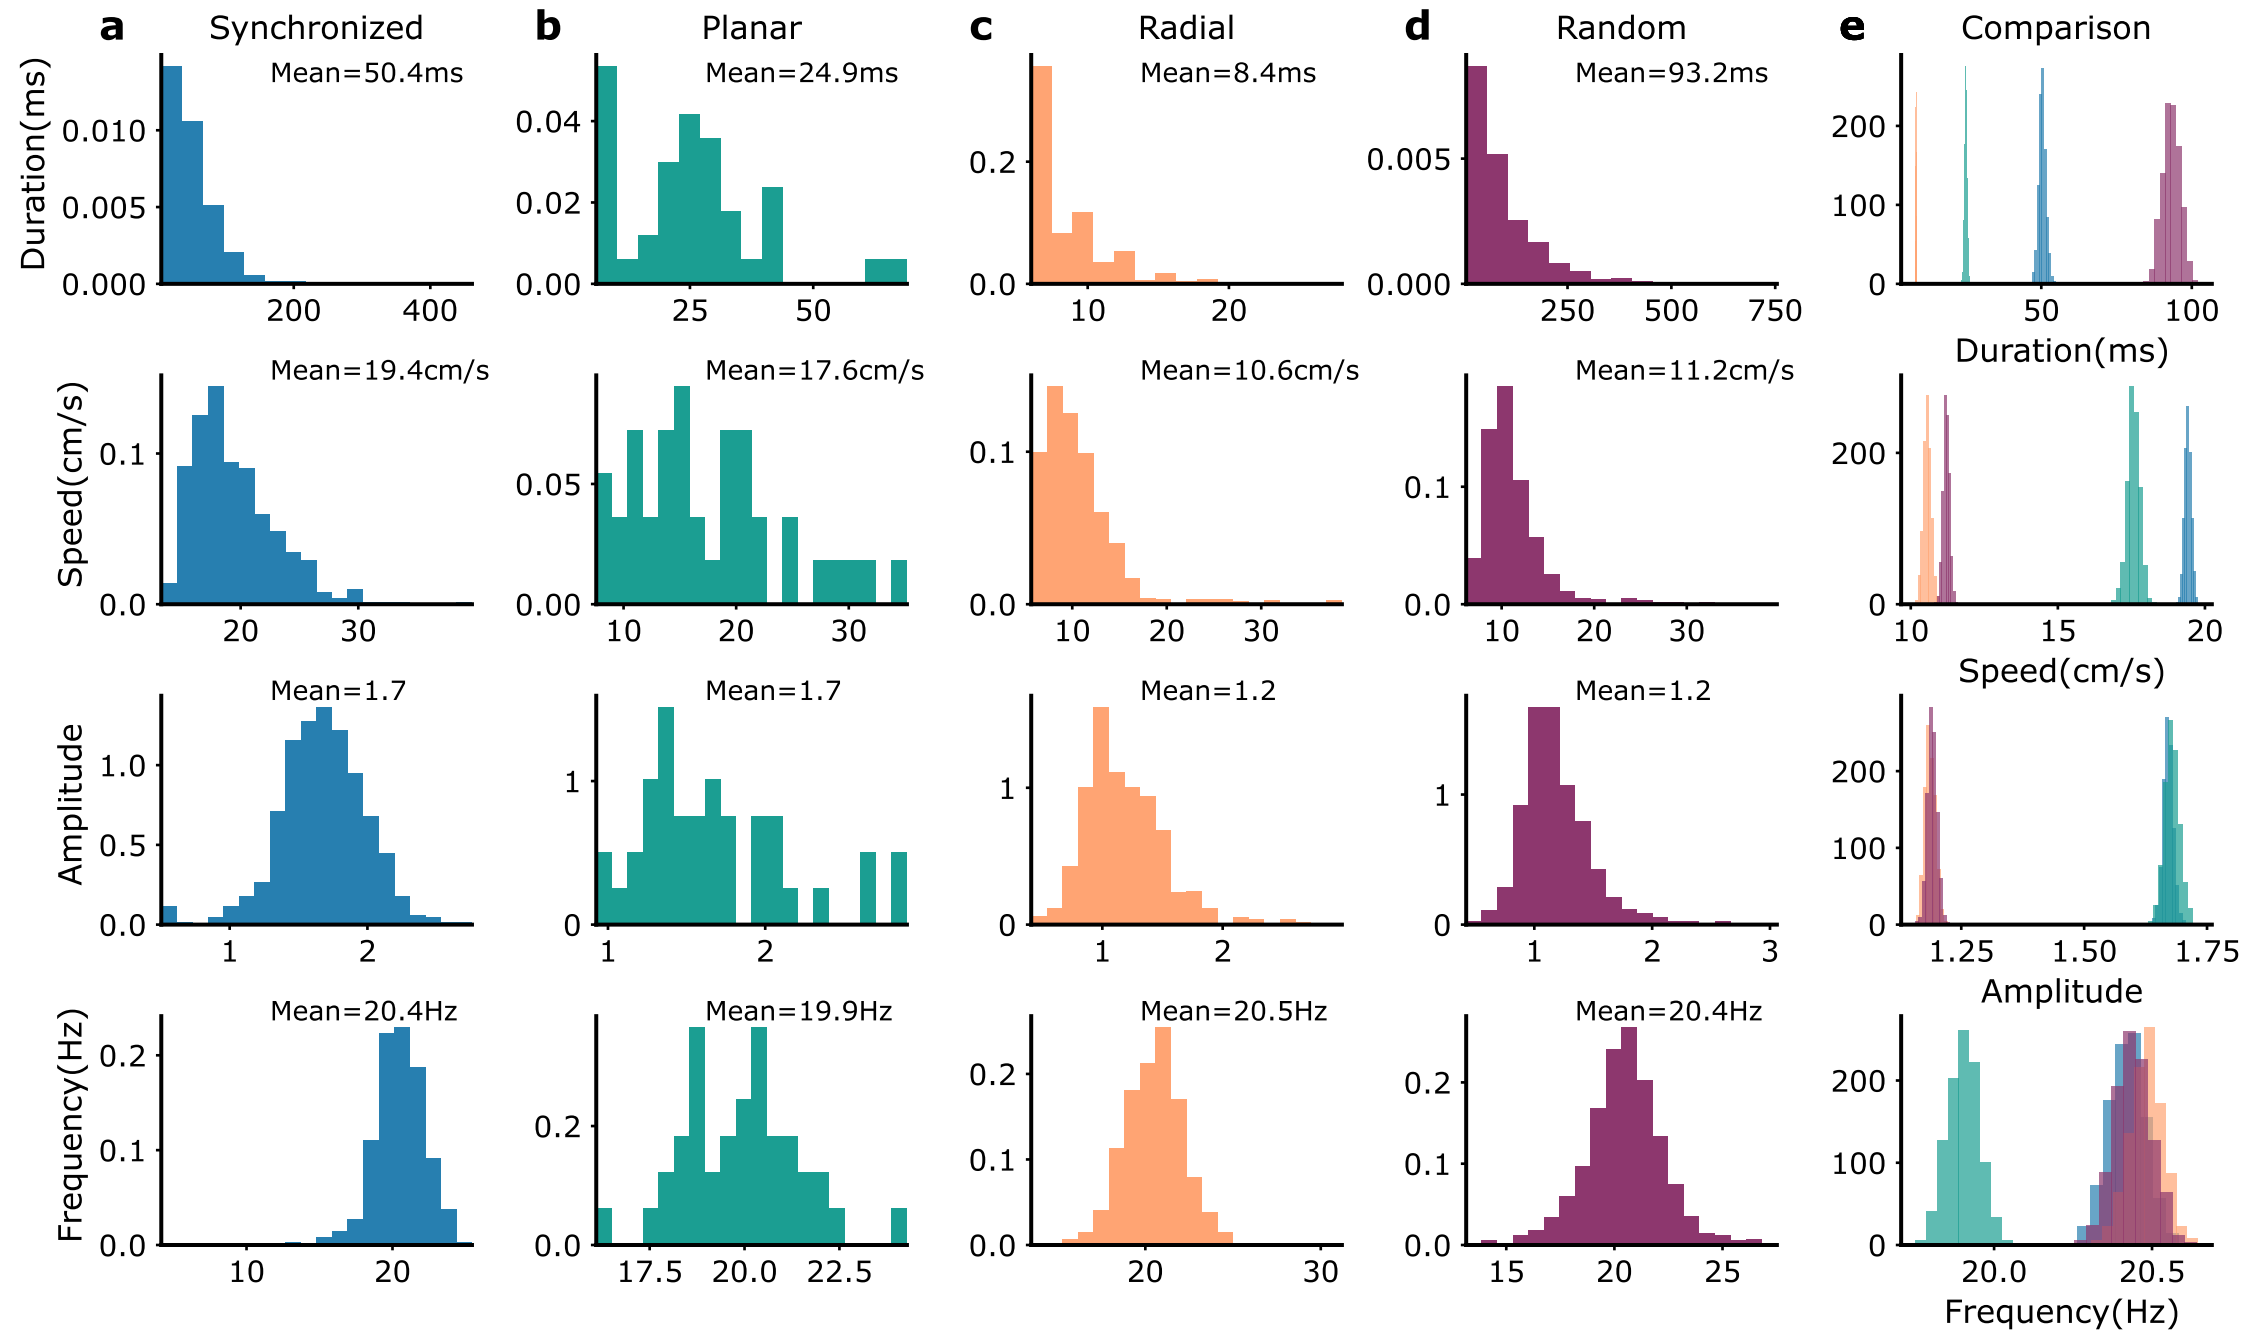

Supplement: supp [file elife_poa_e81446_Figure_3_figure_supplement_6.pdf › elife_poa_e81446_Figure_3_figure_supplement_6.pdf]

**SN'**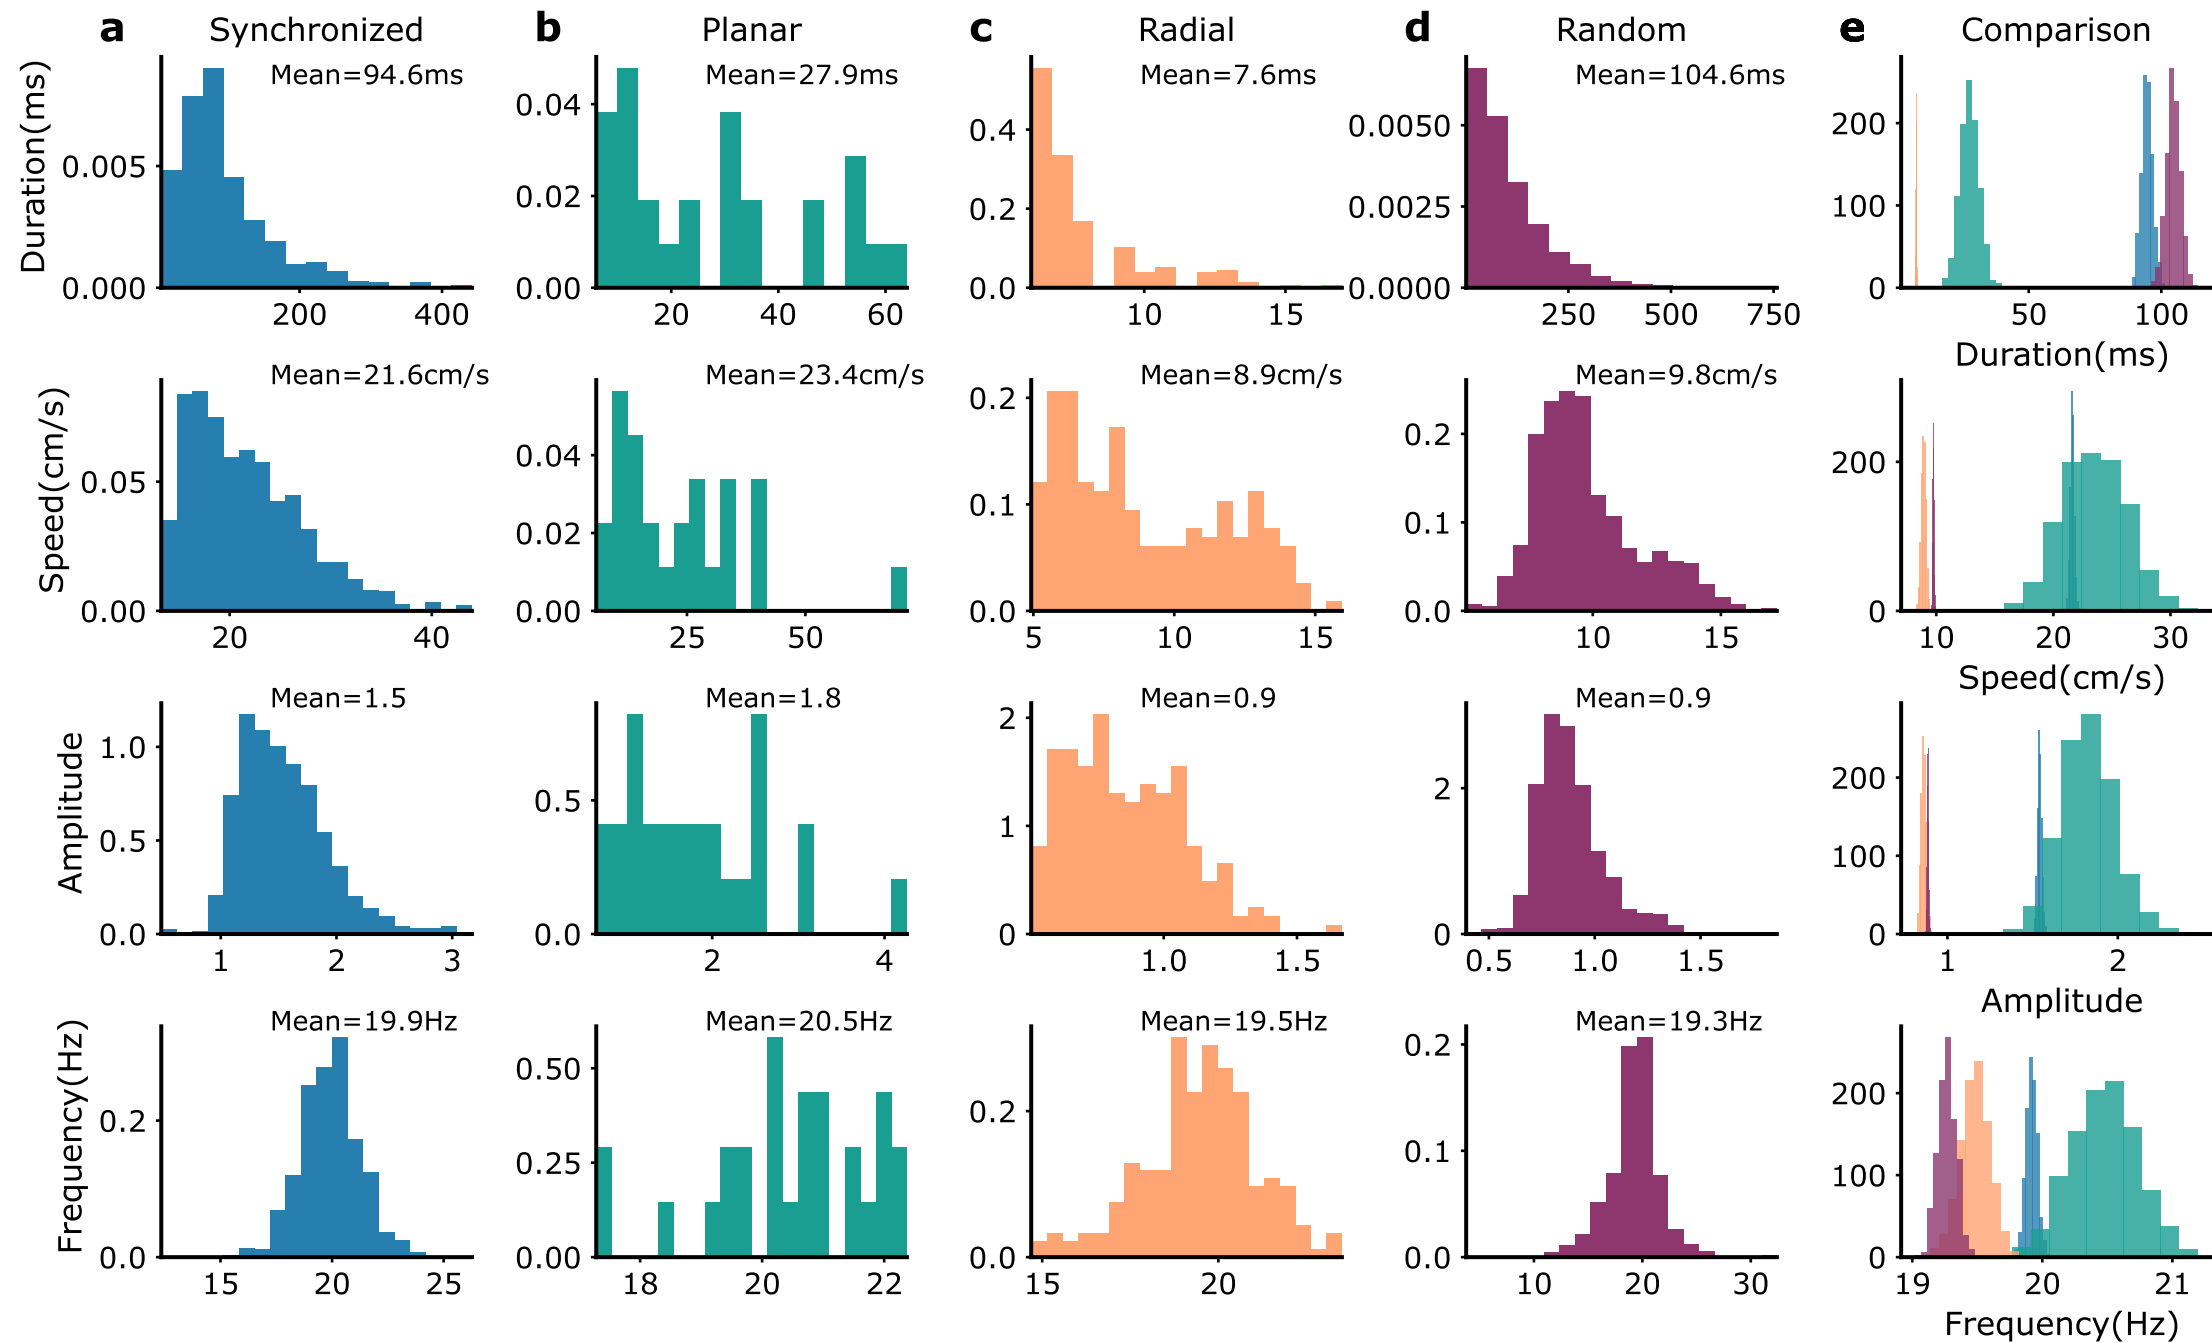

Supplement: supp [file elife_poa_e81446_Figure_3_figure_supplement_7.pdf › elife_poa_e81446_Figure_3_figure_supplement_7.pdf]

## SN (Periodic boundary)

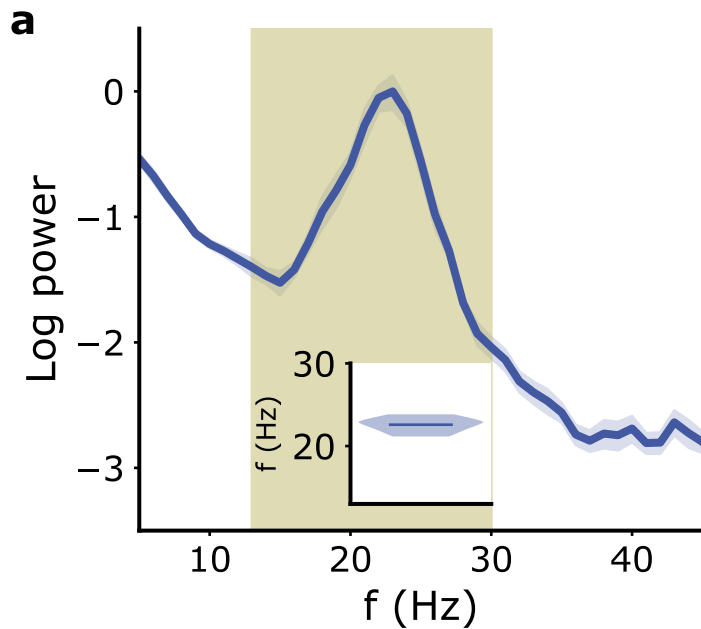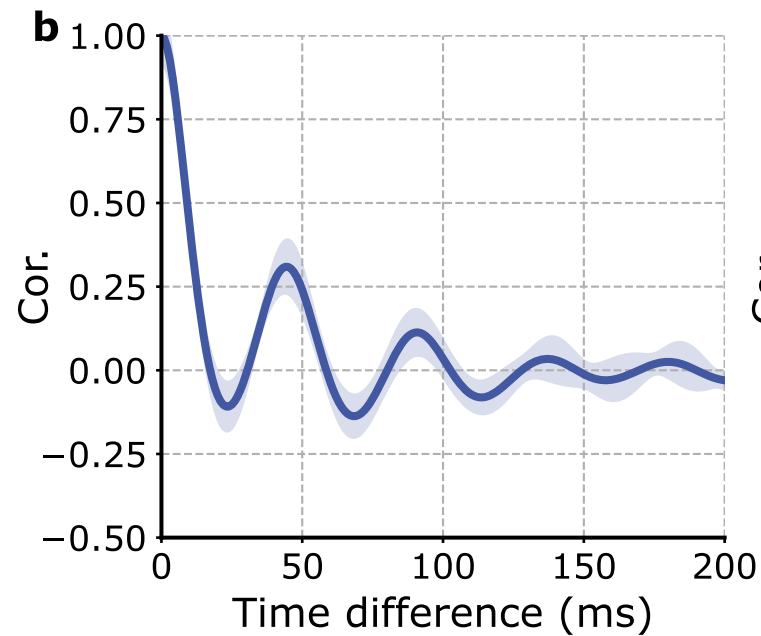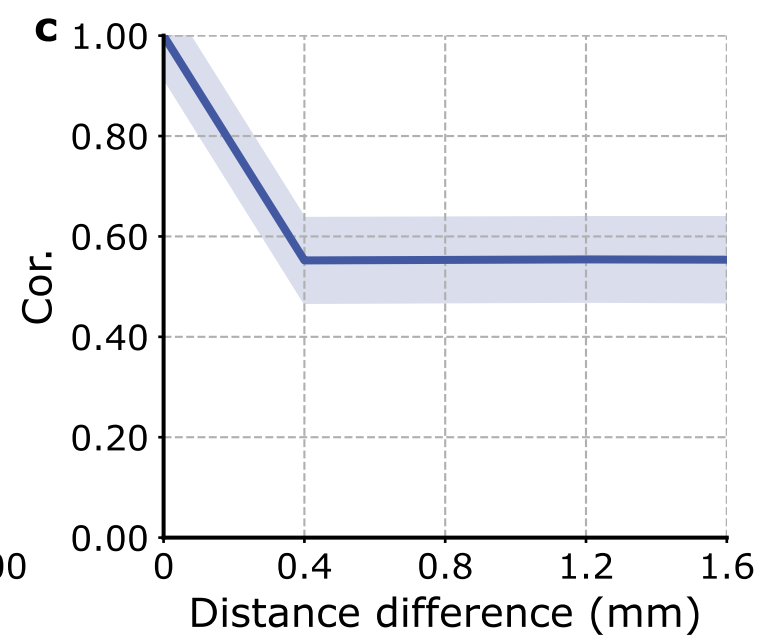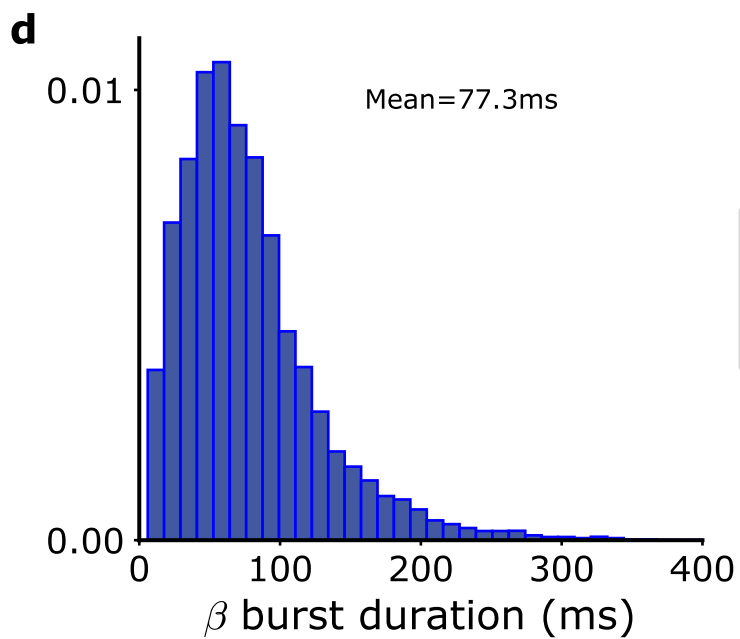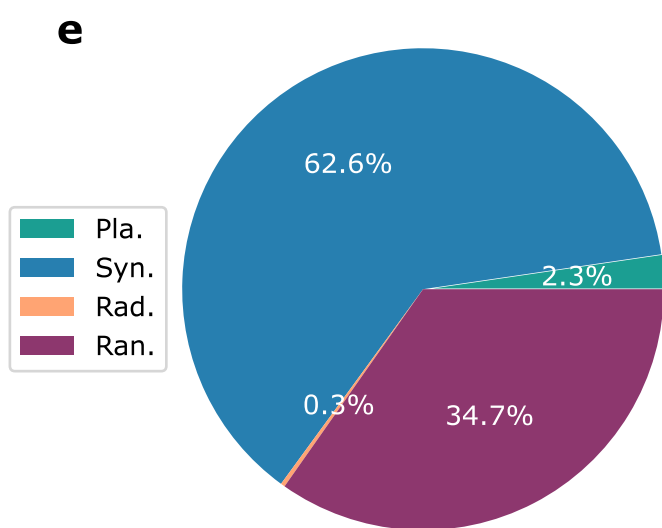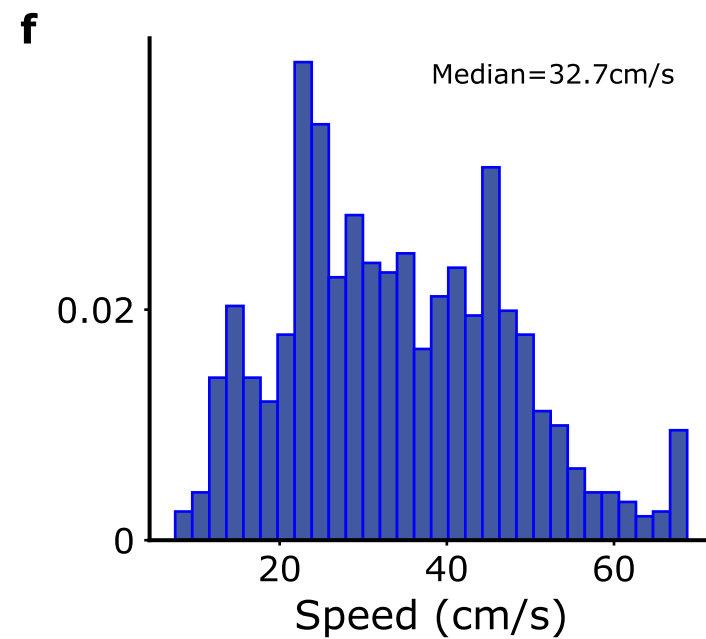

Supplement: supp [file elife_poa_e81446_Figure_3_figure_supplement_8.pdf › elife_poa_e81446_Figure_3_figure_supplement_8.pdf]

$N = 200$

**a**

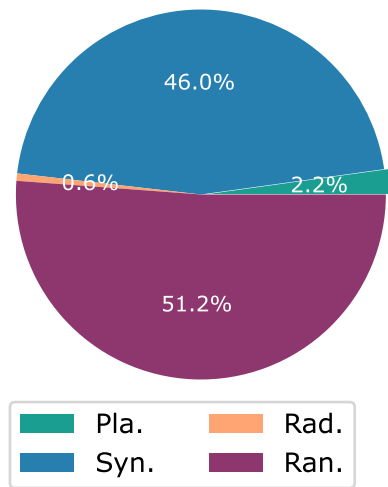

**b**

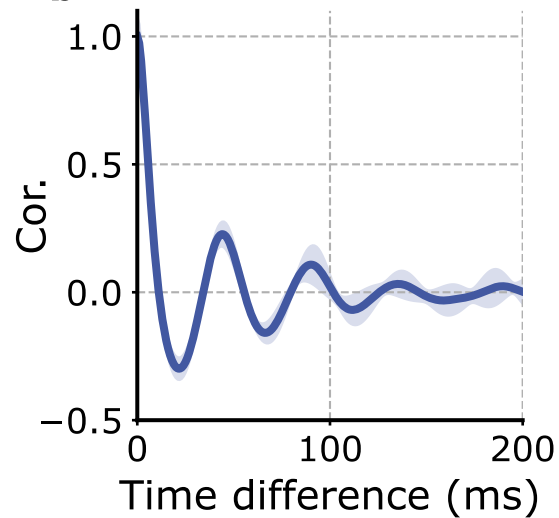

**c**

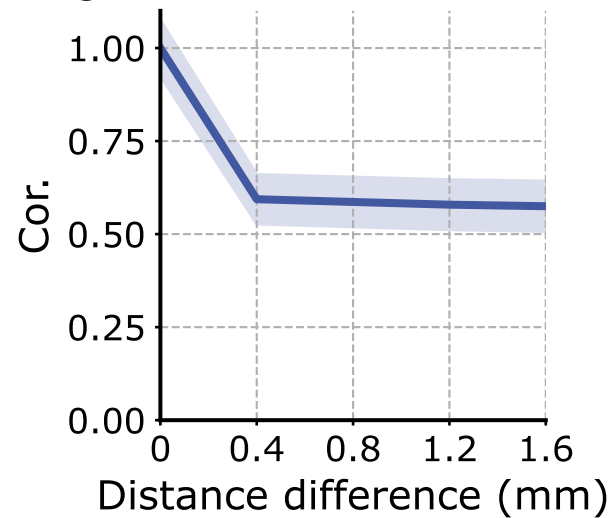

**d**

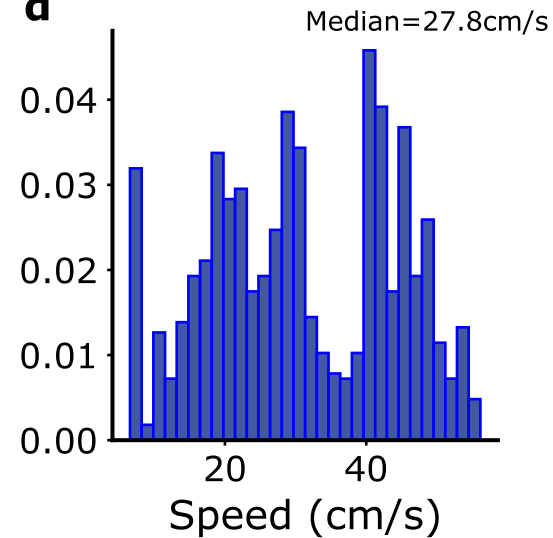

$N = 2000$

**e**

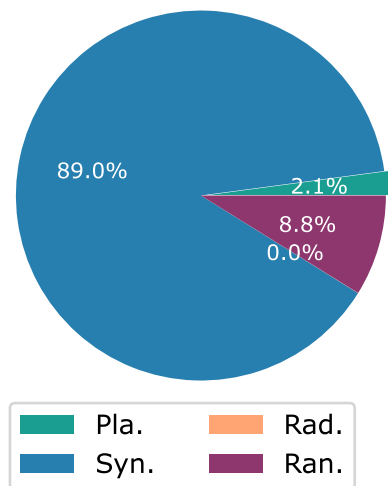

**f**

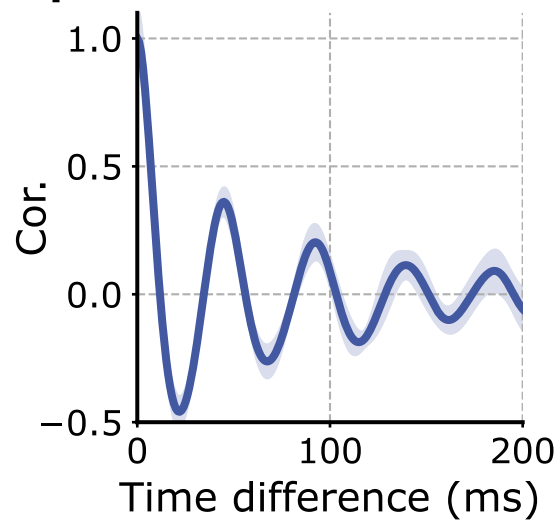

**g**

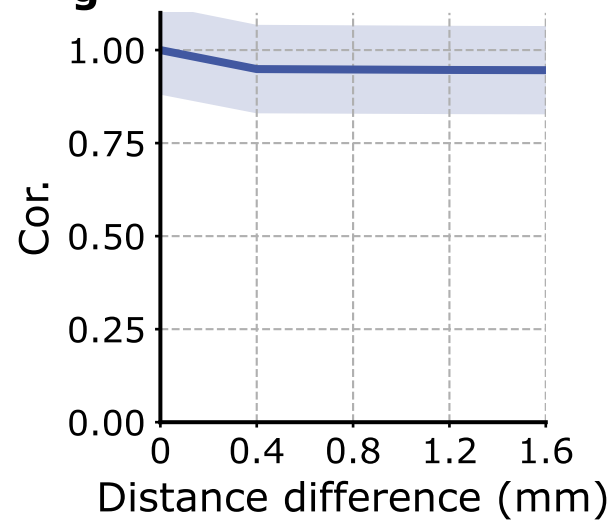

**h**

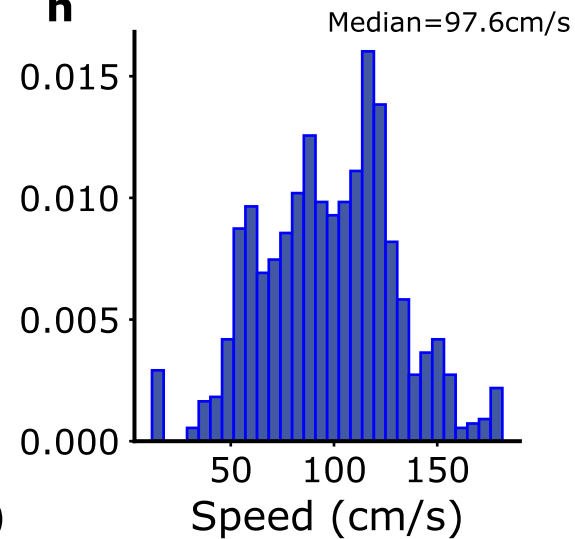

Supplement: supp [file elife_poa_e81446_Figure_3_figure_supplement_9.pdf › elife_poa_e81446_Figure_3_figure_supplement_9.pdf]

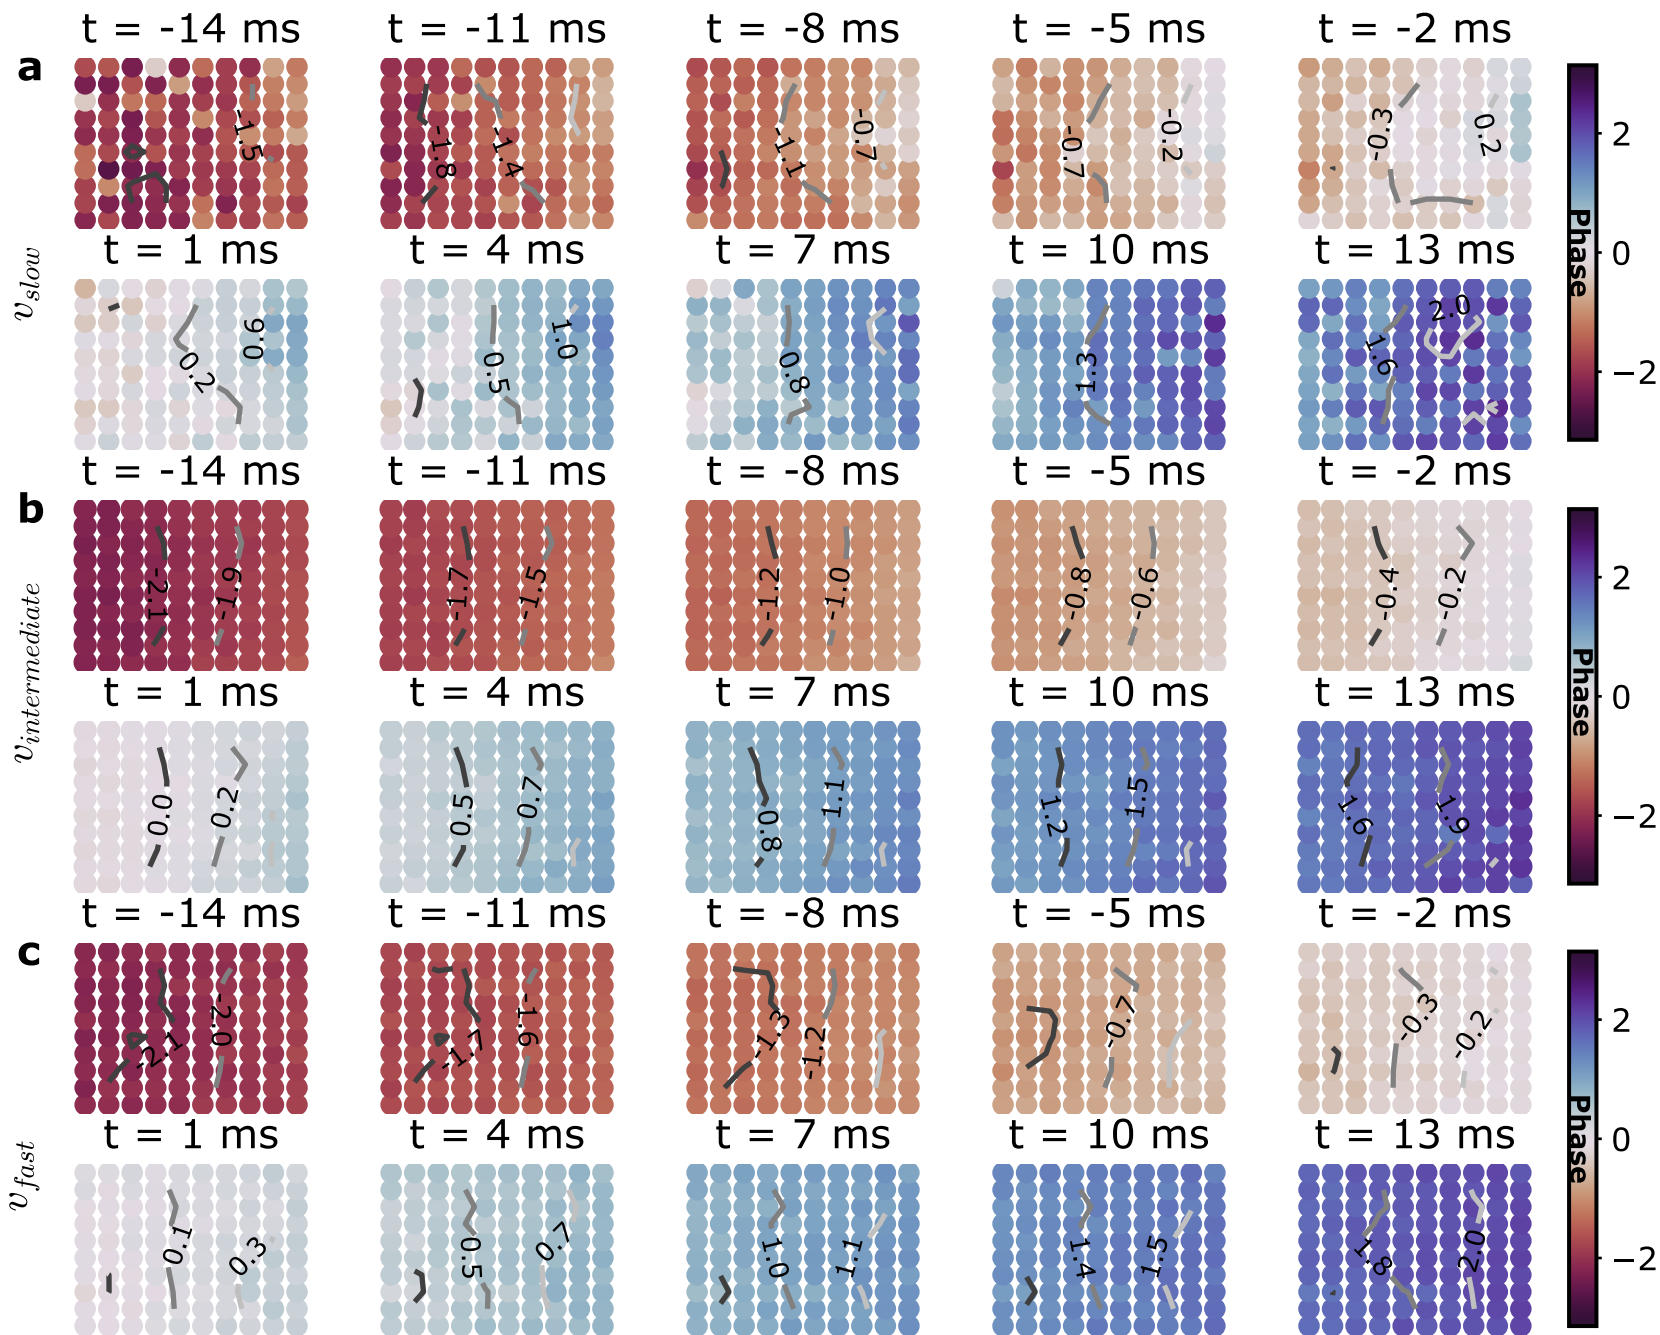

Supplement: supp [file elife_poa_e81446_Figure_4_figure_supplement_1.pdf › elife_poa_e81446_Figure_4_figure_supplement_1.pdf]

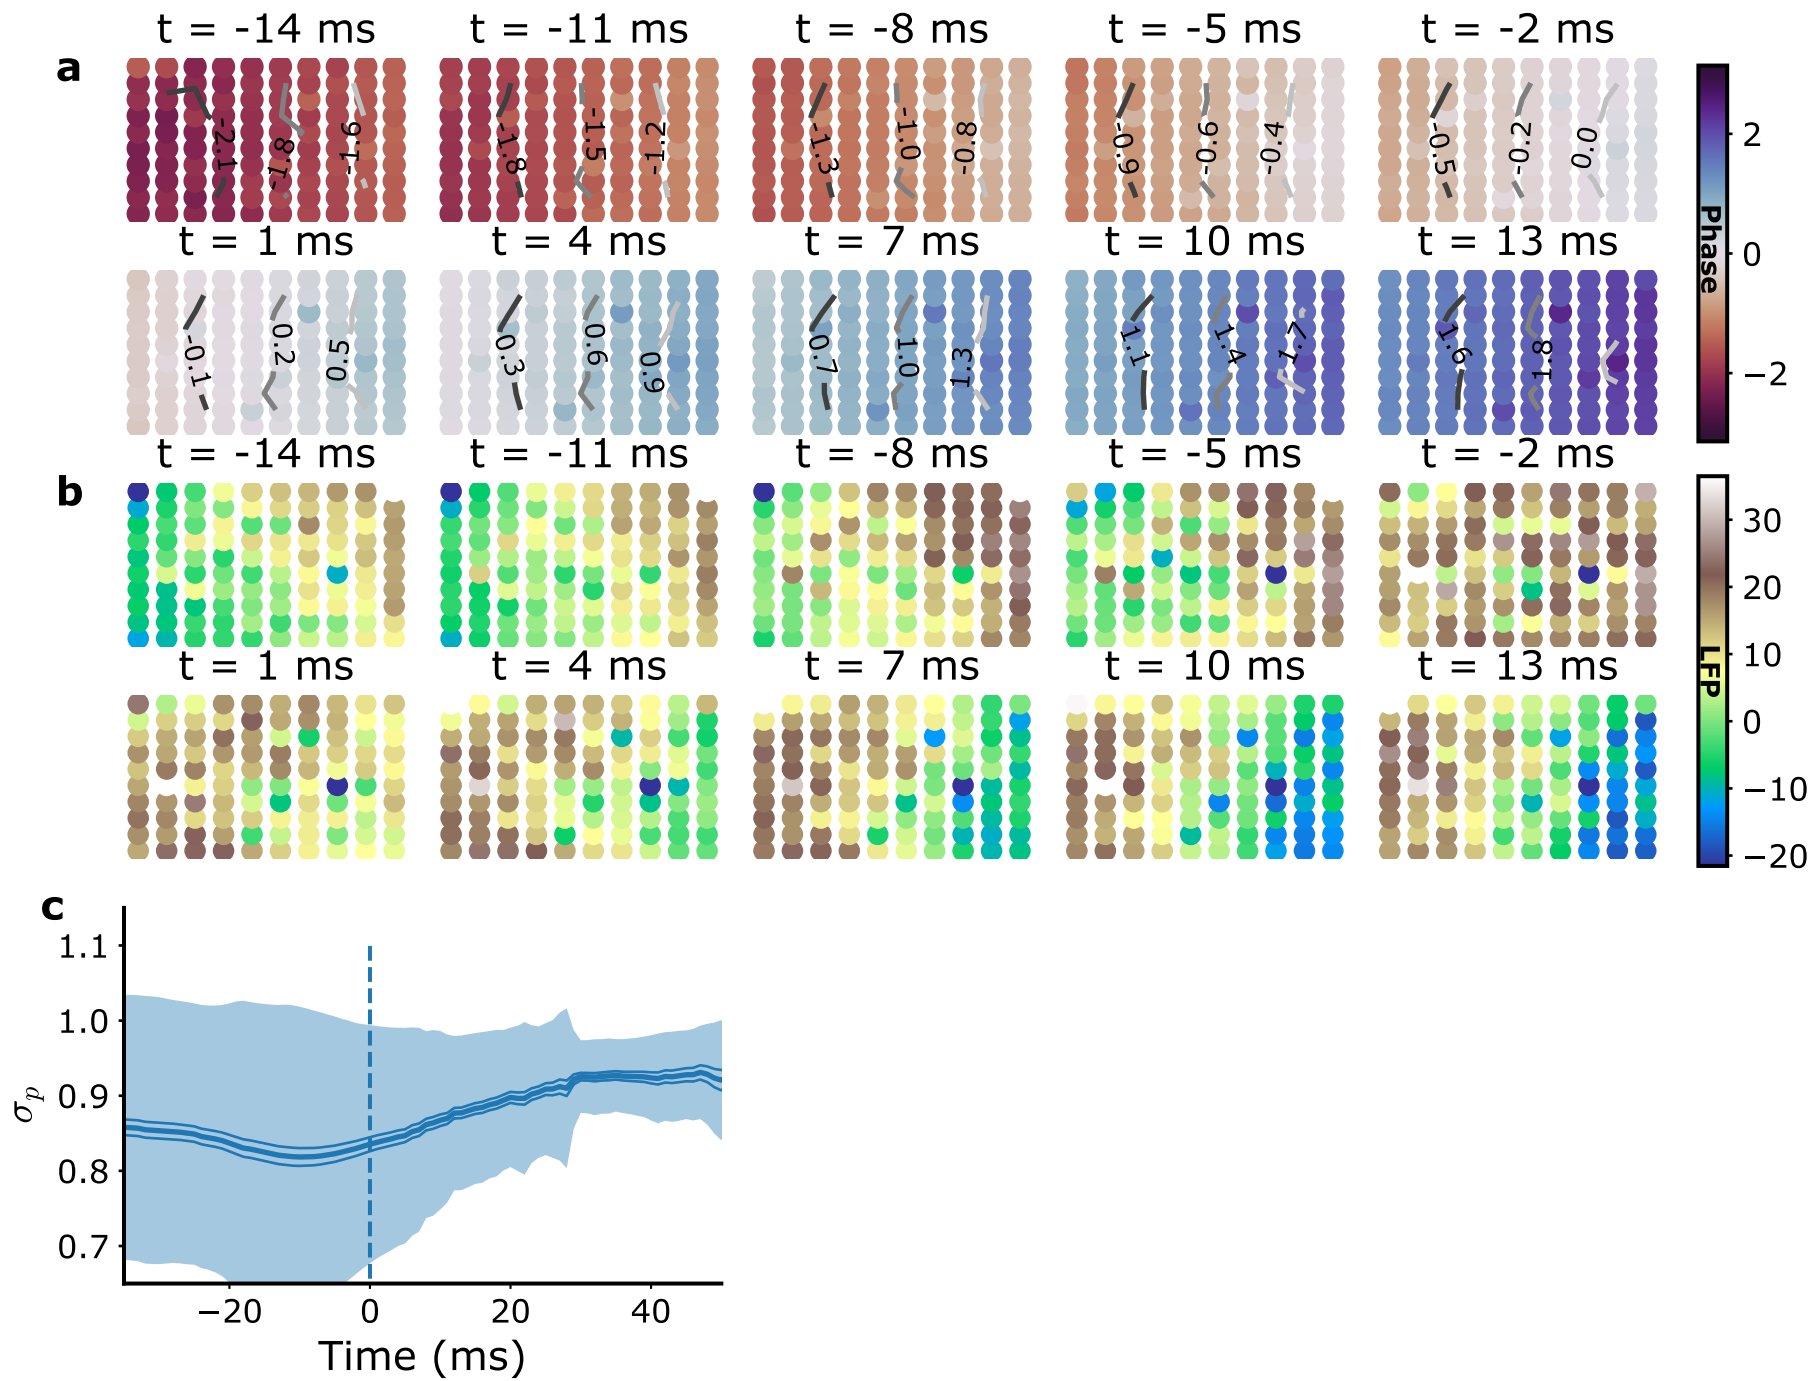

Supplement: supp [file elife_poa_e81446_Figure_4_figure_supplement_2.pdf › elife_poa_e81446_Figure_4_figure_supplement_2.pdf]

**c=0.3**

**a**

$l^I = 2$

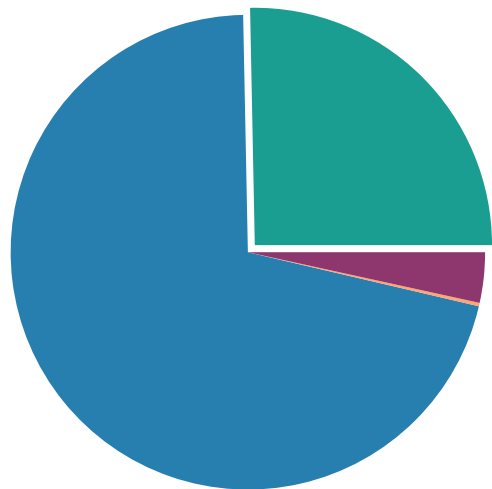

Pla. 25.3% Rad. 0.2%  
Syn. 71.0% Ran. 3.4%

**c**

$l^I = 1$

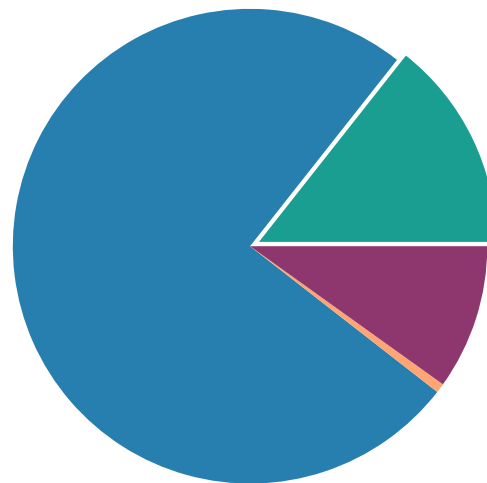

Pla. 14.4% Rad. 0.6%  
Syn. 75.1% Ran. 9.9%

**e**

$l^I = 0.5$

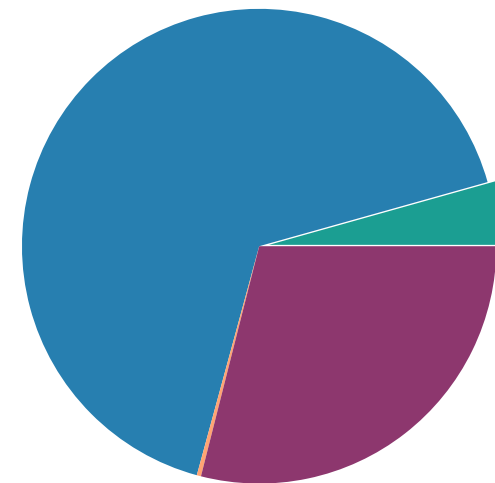

Pla. 4.4% Rad. 0.3%  
Syn. 66.4% Ran. 28.9%

**b**

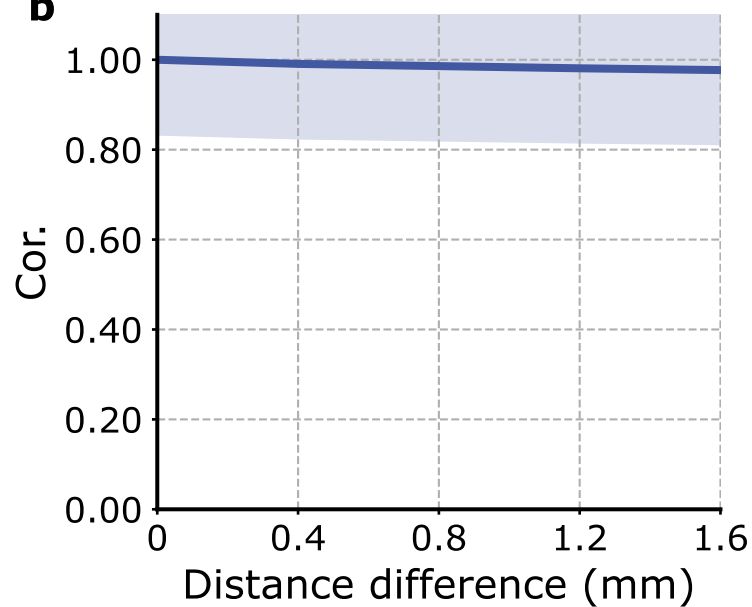

**d**

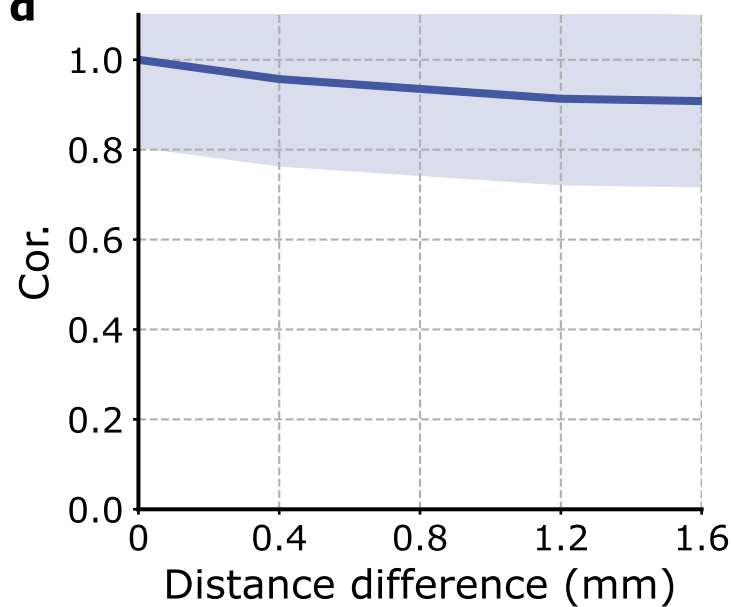

**f**

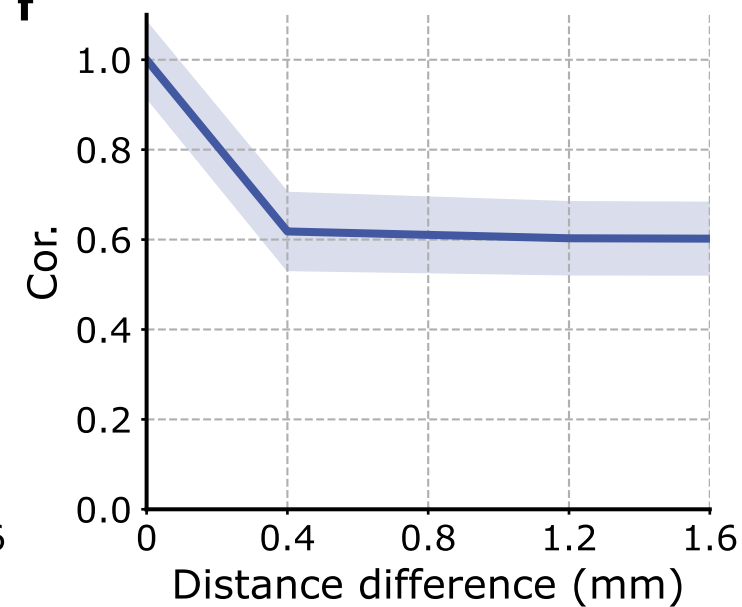

Supplement: supp [file elife_poa_e81446_Figure_5_figure_supplement_1.pdf › elife_poa_e81446_Figure_5_figure_supplement_1.pdf]
